# 1 Social skills group training (KONTAKT™) for 2 Chinese autistic children: a feasibility wait-list 3 RCT protocol

## 4 Authors and Affiliations

5 Uchong Lao<sup>1□</sup> · Huilin Zhu<sup>1□\*</sup> · Fengjing Liang<sup>1</sup> · Wuxia Bai<sup>12</sup> · Peipei Yin<sup>1</sup> · Xiaoqian  
6 Huang<sup>1</sup> · Sonya Girdler<sup>2345\*</sup> · Sven Bölte<sup>234\*</sup> · Xiaobing Zou<sup>1\*</sup>

7 <sup>1</sup> Child Development and Behavior Center, The Third Affiliated Hospital, Sun Yat-Sen University,  
8 China, 2693 Kai Chuang Avenue, Huangpu District, Guangzhou, 510530, China

9 <sup>2</sup> School of Allied Health, Curtin University, Kent Street, Bentley, Perth, WA, 6102, Australia

10 <sup>3</sup> Curtin Autism Research Group (CARG), Curtin University, Perth, WA, Australia

11 <sup>4</sup> Center of Neurodevelopmental Disorders (KIND), Centre for Psychiatry Research, Division of  
12 Neuropsychiatry, Department of Women's and Children's Health, Karolinska Institutet & Child and  
13 Adolescent Psychiatry, Stockholm Health Care Services, Stockholm County Council, Stockholm,  
14 Sweden

15 <sup>5</sup> School of Allied Health, University of Western Australia, Perth, WA, Australia

16

17

18 □ Equal contributions

19 \* Corresponding authors

20 ORCID ID:

21 Uchong Lao: 0000-0001-8658-880X

22 Huilin Zhu: 0000-0002-1052-708X

23 Sonya Girdler: 0000-0001-7992-0800

24 Sven Bölte: 0000-0002-4579-4970

25

26 **Corresponding authors information:**

27 **Huilin Zhu**

28 Email: zhuhlin6@mail.sysu.edu.cn

29

30 **Sonya Girdler**

31 Email: sonya.girdler@curtin.edu.au

32

33 **Sven Bölte**

34 Email: sven.blote@ki.se

35

36 **Xiaobing Zou**

37 Email: zouxb@mail.sysu.edu.cn

38

## 39 **Abstract**

### 40 **Introduction**

41 Challenges in social communication and interaction are common among school-aged autistic  
42 children in mainstream society settings. Although social skills group training (SSGT) is effective in  
43 promoting positive psycho-social functioning outcomes in autistic children, there is no standardised  
44 evidence-based SSGT in Mainland China to date. Therefore, the main aim of this study is to  
45 evaluate the feasibility and acceptability of the culturally-adapted 16-session version of the  
46 KONTAKT™ programme in Chinese autistic children. In addition, this study will provide  
47 preliminary effectiveness and cost-effectiveness data on the 16-session Chinese version of  
48 KONTAKT™.

### 49 **Methods and analysis**

50 This is a randomised, single-blinded, wait-list controlled feasibility study with 36 autistic  
51 children aged 8–12 years with Intelligence Quotient over 70. They will be assigned to either the  
52 immediate training group (ITG) or the delayed training group (DTG) based on gender. Feasibility  
53 will be measured by the mixed-methods data of acceptability and adherence of participants, parents,  
54 and providers. Preliminary effectiveness and cost-effectiveness will be assessed by quantitative data  
55 collected at five-time points. The main outcome is the improvement in social skills as measured by  
56 the Contextual Assessment of Social Skills (CASS). Other outcomes include autism traits, adaptive  
57 functioning, self-assertiveness, psycho-social functioning, parental reflective functioning, and  
58 school support. Common process factors and their effects on outcomes will also be explored.

59 Cost-effectiveness will consider both societal and healthcare perspectives.

## 60 **Ethics and dissemination**

61 The current study protocol has been reviewed and ethics approval obtained from the Ethical  
62 Board Committee at the Third Affiliated Hospital of Sun Yat-sen University (H2023-119-01). The  
63 trial has pre-registered in Chinese Clinical Trials (ChiCTR2300072136) on 05 June 2023. The  
64 results of this trial will be actively disseminated through manuscript publications and conference  
65 presentations.

## 66 **Keywords**

67 Social skills group training; Children; KONTAKT™; Cross-cultural adaptation; Feasibility; Autism;  
68 Chinese

69

## 70 **Strengths and limitations of this study**

- 71 ● Comprehensive assessment via diverse outcome acquisition methods and multiple informants.
- 72 ● Systematic cultural adaptation using the Integrative Cultural Adaptation Framework (ICAF)  
73 ensures the appropriateness of the Chinese version of KONTAKT™.
- 74 ● Collect data on readiness for change, providing insights into “help-seeker” effects.
- 75 ● Limited generalisability due to a single study site, location-specific inclusion, and absence of  
76 active comparator.
- 77 ● Uncertain psychometric properties of certain measures due to a lack of Chinese population

78 data.

## 79 **Introduction**

### 80 **Background and rationale**

81 Autism<sup>1</sup> is a neuro-developmental condition that is characterised by persistent challenges in  
82 reciprocal social interaction and communication [1]. As a result, autistic children often struggle to  
83 fulfill the expected social norms, limiting their maximum functional capacity in everyday contexts  
84 [2]. The estimated prevalence of autism among children aged 6 to 12 in Mainland China is 0.7% (~  
85 1 in 143 children), with nearly half of the identified cases being enrolled in mainstream schools [3].  
86 This data underscores the need for evidence-based interventions to enhance the social competence  
87 and well-being of cognitively capable Chinese autistic children.

88 Among interventions for verbal and cognitively capable school-aged autistic children, Social  
89 Skills Group Training (SSGT) stands out as an evidence-based group approach [4, 5, 6]. Multiple  
90 meta-analyses of SSGT programmes in randomised controlled trials (RCTs) consistently report  
91 moderate to large *d*-type effects in achieving personally meaningful social goals, enhancing social  
92 skills, social skills knowledge, social participation, and social functioning [4, 7, 8, 9].

93 However, the generalisation of SSGT effects remains undefined, primarily due to over-reliance  
94 on parent ratings and a lack of blinded observation [4, 7]. Results from previous meta-analyses [4, 7,  
95 10, 11] inferred that improvements observed in parent and clinical ratings were primarily related to  
96 increased social skills knowledge or specific task-related skills, rather than real-life social  
97 improvements [7].

<sup>1</sup> Herein, identity-first language is used since this is the endorsed terminology among autistic advocates (Kenny, 2016).

98 Another conspicuous limitation is the limited input from autistic children themselves.  
99 Understandably, up to 50% autistic population struggles with understanding and interpreting  
100 emotion states, scilicet co-occurring alexithymia, making it challenging to gather their perspectives  
101 [12]. Additionally, autistic children may encounter comprehension challenges in emotional  
102 vocabulary and Likert scale metrics, raising concerns about the credibility of self-report measures  
103 [13]. However, recent meta-analysis findings suggest that emotional self-awareness in school-aged  
104 autistic children is comparable to their peers despite the high heterogeneity between the included  
105 studies [14]. Furthermore, applying validated non-verbal psychometric measurements, such as  
106 projection tests (Draw-A-Person Test [DAPT], [15, 16]), may be conducive to exploring autistic  
107 children's mental states [17, 18, 19].

108 Another discernible limitation in the past SSGT studies was the sparseness of the  
109 investigations in common process factors [20]. While a significant proportion of SSGT studies have  
110 reported programme adherence and satisfaction [7], the data of these studies were descriptive. In  
111 other words, they did not systematically examine these process factors about outcomes [20].

112 KONTAKT™ programme is a well-established SSGT designed for children and adolescents  
113 with neurodivergent conditions [21]. Originating in Germany [22], it has now been further  
114 developed, standardised, culturally adapted, and evaluated in Sweden [23, 24] and Australia [25].  
115 Three session-length variants (24-session, 16-session, and 12-session) have been standardized and  
116 evaluated through RCTs, demonstrating efficacy in improving participants' social functioning,  
117 adaptive functioning, emotional well-being, emotion recognition and regulation,  
118 personal-meaningful goals, and gaze fixation [23, 24, 25]. Both quantitative and qualitative data

119 support KONTAKT™ as an effective, safe, and well-received program with trivial adverse events  
120 [23, 24, 25, 26, 27].

121 To our knowledge, there is no culturally-standardised SSGT program for school-aged autistic  
122 children in Mainland China. KONTAKT™, with its diverse, individualised, and naturalistic session  
123 design [21], is envisaged to effectively cultivate the social functioning and well-being of Chinese  
124 autistic children, provided that due consideration is taken on Chinese cultural and social norms [28].

125 Cultural adaptation involves systematically modifying an evidence-based intervention to align  
126 with the target population’s needs, values, languages, conditions, and customs [29, 30, 31].  
127 However, only a few cultural adaptation studies on SSGT have well-documented and  
128 theoretically-based methodologies. Moreover, past SSGT studies often lack input from the target  
129 population, despite language translation and the inclusion of culturally relevant content [6].

130 Ignoring cultural differences can significantly hamper the effectiveness of evidence-based  
131 SSGTs for autism [28]. Since the core characteristics of autism involve social interaction and  
132 communication, social-ecological variations between cultures will predominantly influence the  
133 definition between “functioning” and “disorder” regarding autism [32]. These differences also affect  
134 collaboration among various social service providers, including healthcare, schools, and  
135 communities [33, 34, 35]. For example, Chinese parents are less likely to disclose their child’s  
136 autism diagnosis to the child and school, reflecting limited family-school collaboration [36].

137 Various cultural adaptation frameworks are available [29, 30, 37, 38], sharing similar steps  
138 despite some methodological distinctions. This study adopts the integrative cultural adaptation  
139 framework (ICAF) since it aligns with consensus in the field [29]. The ICAF involves five stages:



140 information gathering, preliminary design, preliminary testing, refinement, and final trial. This  
141 study focuses on the first four stages to prepare for the final trial (the last stage).

## 142 **Objectives and hypotheses**

143 The overarching purpose of the present study is to assess the feasibility and cross-cultural  
144 validity of the adapted 16-session version of KONTAKT™ programme for Chinese autistic children  
145 in preparation for a larger RCT trial. The specific objectives are:

- 146 1. Evaluating the integration of KONTAKT™ into a tertiary hospital's routine activity;
- 147 2. Assessing the acceptability and feasibility of data collection;
- 148 3. Examining preliminary quantitative and qualitative effects of KONTAKT™; and,
- 149 4. Exploring the impact of common process factors on outcomes.

150 Our primary hypothesis is that the Chinese 16-session KONTAKT™ version will be feasible  
151 and culturally appropriate for Chinese autistic children with minor revisions, implemented  
152 successfully in a tertiary clinic. We also hypothesize that participants in the immediate training  
153 group (ITG), in comparison to the delayed training group (DTG) [wait-list], will experience greater  
154 improvements in outcomes from Time 1 to Time 3 (waiting period of DTG). We expect that  
155 participants and their parents with higher readiness for change and a stronger alliance in the ITG  
156 will benefit more from KONTAKT™. Lastly, we anticipate that the training effects in the ITG will  
157 persist at follow-up, and significant improvements in children's outcomes will occur in the DTG  
158 from Time 3 to Time 5 (training endpoint of the DTG).

## 159 **Trial Design**

160 This study was approved by the Ethical Board Committee at the Third Affiliated Hospital of  
161 Sun Yat-sen University (II2023-119-01) and preregistered in Chinese Clinical Trials  
162 (ChiCTR2300072136).

163 Any modification to this protocol will be reported to the ethical board and updated in Chinese  
164 Clinical Trials. Following Thabane and Lancaster's guidelines in 2019 [39], the Chinese  
165 KONTAKT™ CHILD protocol is planned and reported following the Standard and Protocol Items:  
166 Recommendations for Interventional Trials (SPIRIT) [40]. The findings of this study will be reported  
167 adherent to the Consolidated Standards of Reporting Trials for social and psychological  
168 interventions (CONSORT-SPI) [41].

169 The Chinese KONTAKT™ CHILD feasibility study has a prospective, wait-list controlled,  
170 single-site, stratified, randomised design. Blinding applies to data collectors, outcome adjudicators,  
171 and data analysts. Three major assessment time-points (ITG: Pre-Post-Follow Up, DTG:  
172 Pre-Pre-Post), with an additional mid-point cost and processing factors data collection for each  
173 group, are included. Measurements will be taken in person except for data from teachers and  
174 prescreening processes. Moreover, this study will employ a mixed-methods design, with  
175 between-group and within-participant comparisons, to explore the feasibility and acceptability of  
176 implementing a large-scale RCT. Randomisation is performed at a 1:1 allocation ratio, with variable  
177 block length and gender stratification.

## 178 **Methods: participants, interventions, and outcomes**

### 179 **Study setting**

180 All in-person assessments and interventions will take place at the outpatient department of the  
181 Child Development and Behaviour Centre (CDBC) of the tertiary academic hospital named the  
182 Third-affiliated Hospital of Sun Yat-sen University in Guangzhou, China. The CDBC, one of  
183 China's first established and leading developmental behaviour paediatric units, has over 20 years of  
184 experience diagnosing and promoting well-being on autistic populations. On the other hand, online  
185 assessments will be designed and distributed using the SurveyStar online survey platform  
186 (<https://wjx.cn/>).

187 The KONTAKT™ certified trainers are experienced CBDC clinicians (clinical psychologists,  
188 developmental-behavioural paediatricians, and therapists) working with Chinese autistic children  
189 (with 3-10 years working experiences). They have completed standardised online KONTAKT™  
190 methodological training, including self-directed training and video-conference seminars, followed  
191 by a 13-session enhanced in-person training..

192 KONTAKT™ sessions, except for the excursion session, will occur in a spacious, well-lit  
193 room where participants and trainers form a circle. The room will also include a flipchart for  
194 session notes and a blackboard for group rules and session agenda. Excursions will be held at  
195 nearby cafes, bubble tea shop,s or convenience stores. Parent sessions will take place in a separate  
196 room with a projector for lectures, following a similar circle setup.

## 197 **Recruitment**

198 **Figure 1** displays the flow of participants throughout the study. Thirty-six autistic children will  
199 be recruited through the outpatient department of the CDBC. Recruitment avenues will be multiple,  
200 which include word-of-mouth, referral by clinicians, posters with study information displayed at the  
201 CDBC clinic, and advertising articles published on the WeChat<sup>®</sup> Official account  
202 (<https://www.wechat.com/>).

203 Parents will complete an online registration questionnaire if they and their children desire to  
204 participate. They will provide their children's demographic information, diagnostic statuses,  
205 previous evaluations on the Wechsler Intelligence Scale for Children-IV Chinese version (WISC-IV)  
206 [42], the Autism Diagnostic Observation Schedule-Generic (ADOS-G) [43], and screen for  
207 behaviour problems using the Childhood Behavior Checklist-parent version (CBCL) [44], and their  
208 contact information. Parents should expect to spend approximately 10-15 minutes completing the  
209 questionnaire. Applying the step of online registration can facilitate the analysis of demand, and  
210 research coordinators can monitor recruitment.

211 After parents submit the registration questionnaire, our research coordinators will assess  
212 candidate eligibility. Prequalified candidates' parents will then undergo a 10-15 minute prescreening  
213 phone interview, discussing their children's school lives, academic performances, and special needs,  
214 and addressing any study-related questions. The interviews will also verify the candidate's cognitive  
215 and verbal abilities for the course materials.

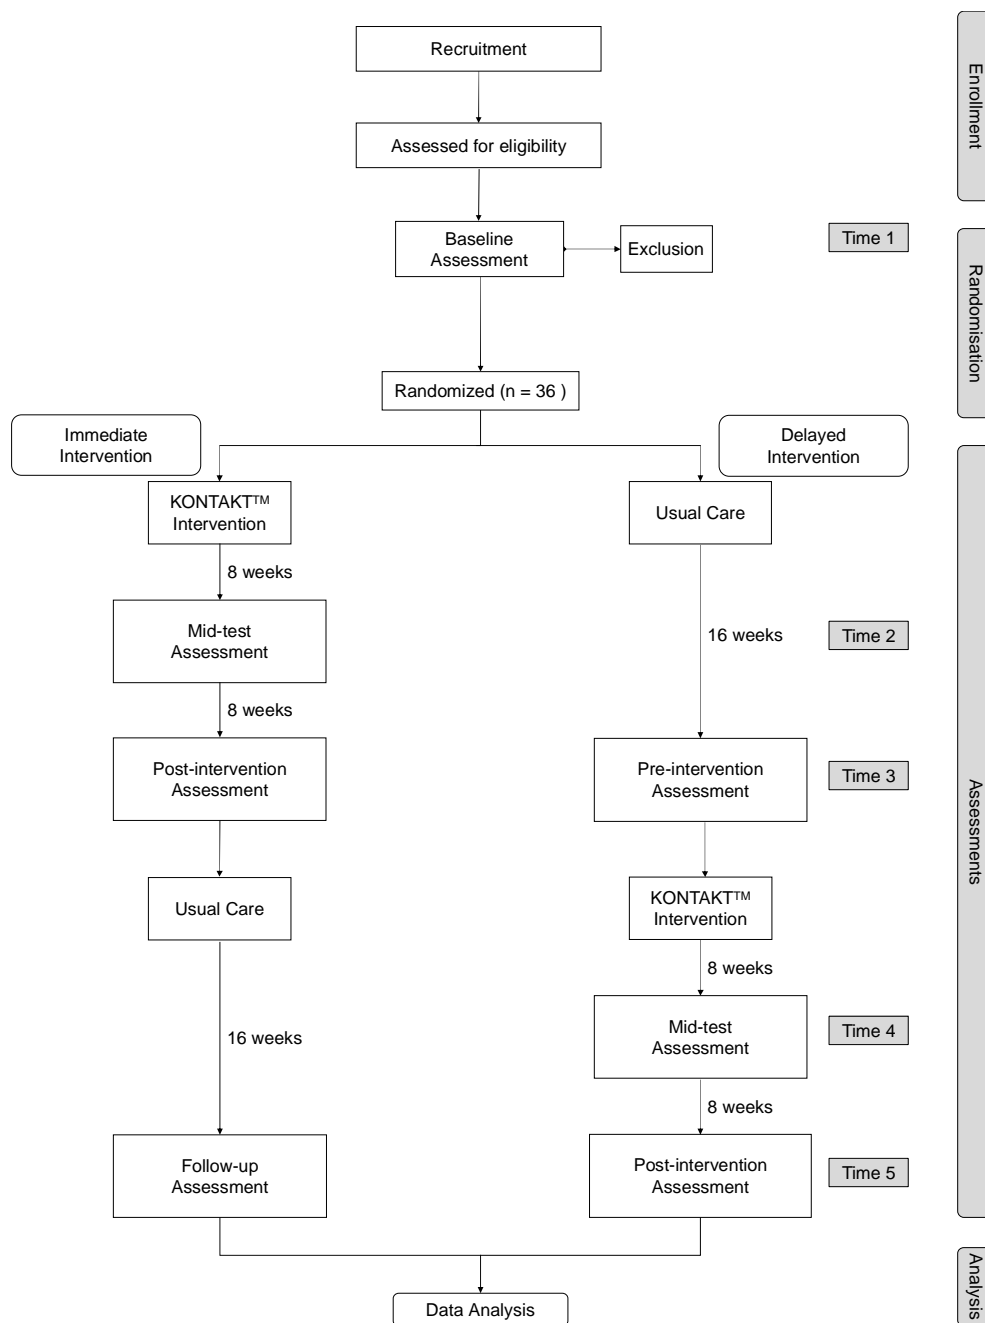

216

217 **Figure 1** Chinese KONTAKT™ Child feasibility study flowchart.

218 If fulfilling the prescreening criteria, candidate participants and their parents will come to the  
 219 clinic for a 50-minute face-to-face intake interview with the research coordinator. During the intake  
 220 interview, both children and parents will each have about a 20-minute individual interview with the  
 221 research coordinator. If the family meets the eligibility criteria and agrees to participate, an written

222 informed consent form will be obtained.

223 **Eligibility criteria**

224 *Inclusion criteria*

225 (1) Aged 8-12 years;

226 (2) A clinical diagnosis of autism (confirmed by ADOS-G, module 3);

227 (3) A Full-scale IQ > 70 on the WISC-IV;

228 (4) Resided in Guangzhou city for the past 12 months.

229 *Exclusion criteria*

230 (1) Significant physical impairment or severe metabolic disease(s);

231 (2) Significant rule-breaking or aggressive behaviours within the last six months, as confirmed  
232 by CBCL;

233 (3) Low intrinsic motivation to participate;

234 (4) Significant difficulties with Chinese characters reading comprehension or Mandarin  
235 expression and comprehension;

236 (5) Prior or current behaviour or psychiatric conditions that could disrupt participation or  
237 necessitate other treatment(s).

238 Participants with common co-occurring neurodevelopmental conditions in autistic individuals,  
239 such as attention-deficiency hyperactivity disorder, depression, anxiety, and tic disorder, are eligible  
240 if these conditions do not significantly interfere with participation. They can continue their regular  
241 pharmacological treatments, psychological therapies, or interventions while participating in

242 KONTAKT™. Written informed consent will be obtained from participants and parents after a  
243 thorough explanation of the study during the intake interview..

## 244 **Intervention**

### 245 *KONTAKT™ Intervention*

246 Before the completion of this protocol, a preliminary adaptation of KONTAKT™ (The first  
247 step of the ICAF - Information gathering) has been conducted. The KONTAKT™ programme  
248 includes workbooks for trainers, children, and parents, ensuring intervention fidelity. To adapt the  
249 16-session variant of KONTAKT™ from Australian English to Mandarin Chinese, we followed a  
250 rigorous process. First, we translated the materials and verified accuracy among authors. Then, a  
251 workgroup of KONTAKT™ trainers, who are also CDBC clinicians, provided feedback. This step  
252 had led to a significant modification on the discussing topic regarding autism diagnosis in a more  
253 general and implicit way (session 3). In addition, to facilitate parents discussing the autism  
254 diagnosis with their child, information relating to “how to talk about the diagnosis with your child”  
255 was added in the first parent session. This adaptation was made because study shows that over 60%  
256 of autistic children do not notice their autism diagnoses, with 40% of parents of autistic children  
257 prefer to remain the diagnosis undisclosed to their autistic children in China. Additionally, parents  
258 received support in helping their children with homework, including role-play exercises and  
259 demonstration videos. We included session-by-session feedback and progress reports for parents, as  
260 Chinese parents often require more social coaching support. We modified and added questions,  
261 games, activities, and scenarios in line with Chinese cultural norms. We also created a Chinese

262 name for KONTAKT™, emphasizing meaningful socialization (交得益). Finally, a family with an  
263 autistic adolescent proofread the manual to enhance language fluency and localise terminology.  
264 Additionally, we customised the logo and stationary to foster group cohesion among participants.

265 The KONTAKT™ programme integrates Cognitive Behaviour Therapy principles and settings  
266 tailored for autistic children (see **Figure 2**) [21], including psychoeducation, observational learning,  
267 modeling, behavioural activation, homework, computerised cognitive training, rehearsal, structured  
268 agenda, and parental involvement. It employs mandatory, recurring, and variable activities to foster  
269 participants generalising their personally meaningful social goals. Sessions aim to enhance  
270 understanding of social norms, develop adaptive socio-emotional skills, and promote practical  
271 applications. The first 11 sessions have consistent themes and assignments, while later sessions are  
272 more individualised.

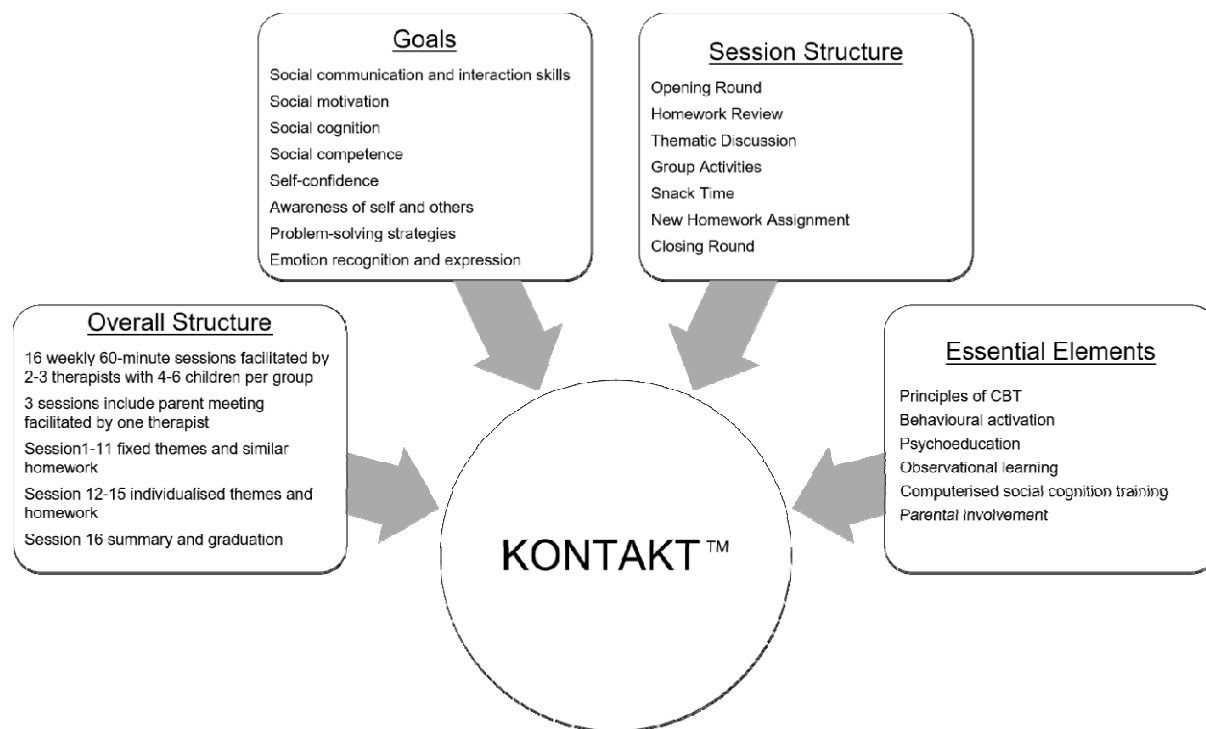

273 **Figure 2** Elements, structures, and goals of KONTAKT™.



274 A group of 4-6 participants will attend 16 consecutive sessions of KONTAKT™ led by 2-3  
275 trainers over weekends, with each session lasting 60 minutes. Three parent sessions will take place  
276 at the beginning, middle, and end of the training, offering individual feedback on their children's  
277 progresses, autism knowledge and discussing autism diagnosis with their children, and facilitating  
278 parents as social coaches for their children. Parents can ask questions, share feedback, and provide  
279 mutual support during parent sessions. Parents are encouraged to assist with homework, and trainers  
280 will offer children's session-by-session feedback after class. Refer to **Supplementary Table 1**  
281 (**online supplemental file 1**) for the structure and content of the KONTAKT™ Chinese version.

282 To safeguard the fidelity of the KONTAKT™ treatment protocol, trainers will complete  
283 session-by-session fidelity checklists and receive supervision from certified KONTAKT™ trainers.

#### 284 **Description on the rationales of adapting the Chinese 16-session KONTAKT™**

285 The reasons for choosing the 16-session KONTAKT™ variant are four-fold. Firstly, while the  
286 RCT efficacy study from Australia indicates that four additional sessions to the 12-session variant  
287 of KONTAKT™ showed no substantial improvement on autistic traits [25], the feasibility and  
288 efficacy of the 16-session variant remain unestablished in autistic children. Additionally, previous  
289 research found that the 12-session variant did not significantly outperform standard care [23], and  
290 the 24-session variant had a higher attrition rate (26% vs 11%/14%) [23, 24, 25]. Thirdly, aligning  
291 with the Chinese academic year structure, which consists of two terms with approximately five  
292 months each, the 16-session version is more practical. Lastly, to ensure ethical and practicality, we  
293 aim for a 4-5 month waiting period in the wait-list group, as extended waiting times can impact

294 adherence negatively [45].

### 295 **Explanation for the choice of comparators**

296 The waiting period of the DTG is limited to 4-5 months, roughly equivalent to one round of  
297 KONTAKT™ training. While an active comparator in an RCT is typically the most robust, due to  
298 limited clinical resources in Mainland China, a wait-list control group is considered more practical.  
299 Moreover, given that “non specific” care is common in Mainland China, a wait-list control group  
300 allows for assessing the additional impact of KONTAKT™ on usual care.

### 301 **Intervention adherence**

302 We will use a participant attendance sheet to track compliance, aiming for at least 80%  
303 attendance (13 out of 16 sessions) as acceptable. We also record homework completion, with a  
304 target of over 60% considered tolerable.

305 We adopt several approaches recommended by Robiner to enhance the wait-list group’s  
306 adherence [46]:

- 307 (1) Provide detailed study information during intake interviews;
- 308 (2) Emphasize the importance of adherence;
- 309 (3) Garner trust with families during intake interviews;
- 310 (4) Offer face-to-face assessments for regular clinical visits;
- 311 (5) Minimise waiting time to 4-5 months with a single-round intervention;
- 312 (6) Schedule appointments at convenient times.

### 313 **Randomisation**

314 After the initial visit to the clinic, the participant will be randomised to either ITG or DTG.  
315 Randomisation will be conducted by a third party not involved in the Chinese KONTAKT™  
316 CHILD trial using computer-generated random numbers. The permuted block numbers of 4-6 will  
317 be used to restrict randomisation within the strata (gender). Each participant will have a unique code  
318 to denote.

### 319 **Assessments/measures**

320 Outcomes from multiple informants (children, parents, teachers, clinical ratings) and multiple  
321 means (questionnaires, interviews, observations, projective tests) will be acquired. The assessment  
322 timeline is presented in **Table 1**.

323 [Table 1]

324 All online questionnaire fields are mandatory, eliminating the expectation of missing data. QR  
325 codes will be used for distributing the registration and teacher questionnaires, completed via the  
326 WeChat® app. Each teacher questionnaire will assign unique research serial numbers for participant  
327 identification.

328 *The primary outcome* of the Mandarin KONTAKT™ CHILD study is social communication  
329 and interaction skills improvement measured by the Contextual Assessment of Social Skills (CASS),  
330 an observational measure. *Secondary outcomes* include autistic characteristics (Social  
331 Responsiveness Scale-2 [SRS-2]), generalised social skills (Snack Time Assessment of  
332 Relationships and Social Skills [STARSS]), adaptive functioning (Adaptive Behaviour Assessment

333 System-II), self-esteem and self-concept (Self-concept Scale Draw-A-Person [SCS-DAP], Child  
334 Rosenberg Self-Esteem Scale [CRSES]), cognitive development and psychosocial well-being  
335 (Koppitz Draw-A-Person Test, Child Outcome Rating Scale), perceived school support school level,  
336 and parental reflective functioning. *Feasibility outcomes* include acceptability, appropriateness, and  
337 negative effects from quantitative data (fidelity checklists, recruitment rates, attendance rates,  
338 homework completion rates, Group Session Rating Scale, Theoretical Framework of Acceptability  
339 Questionnaire, and Negative Effects Questionnaire) and qualitative data from focus groups  
340 post-intervention. *Common process factors measurements* include treatment alliance (Therapeutic  
341 Alliance Scales for Children) and readiness for change (Preparedness for Participating in  
342 KONTAKT™ Scale). *Cost-effectiveness outcomes* include healthcare consumption and productivity  
343 loss (the tailored version of the Trimbos/iMTA questionnaire for patients with a psychiatric disorder  
344 child version) and health-related quality of life (Child Health Utility 9D, EQ-5D-Y).

345 For details of these measures, see **online supplemental file 2**.

## 346 **Retention**

347 Assessment appointments will offer flexibility within the time frame, with reminders from  
348 research assistants. Paper questionnaires will be provided for those unable to have in-person  
349 assessments, with families returning them by post. All non-retention events will be documented and  
350 reported.

## 351 **Data management**

352 In the Chinese KONTAKT™ CHILD feasibility study, all paper data will be converted to

353 electronic format. Trained research assistants will input the data within two weeks after each  
354 assessment. Both paper and electronic data will be stored in EpiData [47] with double-entry for data  
355 integrity. Checks for referenced range values, valid values, and regular data consistency will be  
356 applied. Non-numeric data, including open-ended questions and notes, will be entered as originally  
357 written.

358 Video and audio recordings will be labeled with unique serial names, and their details recorded  
359 in the EpiData repository. Paper documents will be securely stored in locked filing cabinets at the  
360 clinic. Electronic textual data will be password-protected. Video and audio files will have dual  
361 backups on encrypted hard disks. Only the principal investigator will have full data access.

362 Incremental data and recording files will be back-up daily.

### 363 **Sample size**

364 The primary outcome measure is CASS. Previous SSGT studies applying the CASS suggested  
365 a medium effect size (ES) of 0.42 [48]. Additionally, a rough average ES of 0.40, as measured by  
366 the SRS-2, is derived from the three prior RCT studies evaluating KONTAKT™ [23, 24, 25],  
367 informs the expected ES for the future Chinese KONTAKT™ CHILD main trial. According to  
368 Whitehead et al., a feasibility study with a sample size of 15 per treatment arm allows for detecting  
369 a medium EF (0.3~0.7) with 90% power and two-sided 5% significance in the main trial [49].  
370 Accounting for a 15% attrition rate from previous KONTAKT™ evaluation studies, we require a  
371 sample size of  $n = 18$  per arm ( $N = 36$  in total).

372 **Statistical analysis**

373 *Statistical methods for primary and secondary outcomes*

374 The primary outcome for this study is social-communication skills improvement as measured  
375 by the CASS, with the follow-up being the primary endpoint. The analysis will follow the  
376 intent-to-treat (ITT) principles [50], and all data from every participant will be analysed. Missing  
377 data will be handled based on established guidelines for each measure or CONSORT-SPI statements.  
378 No interim analysis will occur.

379 Data will be checked for normality and variance heterogeneity. Baseline demographics will be  
380 compared between ITG and DTG using t-tests or Wilcoxon rank test (continuous variables) and  
381 chi-square tests (categorical variables) to verify group comparability. Random mixed effects  
382 regression models, which have the advantage of handling missing data, will compare ITG and DTG  
383 for primary and secondary analyses, considering time (baseline, endpoint, follow-up), group (ITG,  
384 DTG), age, gender, IQ, co-occurring conditions, process factors (PPKS, GSRS at baseline), and th  
385 interaction variable (time  $\times$  group). Participants' ID will be a random effect to account for  
386 intra-individual correlations. Intervention effects will be reported as least-square mean differences.  
387 ES will be reported by dividing the groups' mean difference (baseline to endpoint and baseline to  
388 follow-up) by the pooled standard deviations, with positive values favoring intervention.

389 Feasibility measures will be reported descriptively. Additionally, qualitative data will be  
390 transcribed verbatim, de-identified, then imported into Nvivo 12 for theme-based analysis.

391

392 *Health economic analyses analysis*

393 Cost-effectiveness analysis (CEA) will follow an ITT basis, considering societal and  
394 healthcare perspectives. Cost differences will be statistically tested, while resource usage  
395 differences will not be compared to prevent false positives. Quality-adjusted life year (QALY) will  
396 be calculated from EQ-5D-Y and CHU9D scores using validated algorithms for Chinese children  
397 and adolescents [51, 52]. Given potential non-normality in cost data, a non-parametric random  
398 forest permutation model will handle missing data. The incremental cost-effectiveness ratio (ICER)  
399 will be calculated as  $\Delta\text{cost}/\Delta\text{QALYs}$ . Cost differences between ITG and DTG at different time  
400 points will be analysed via linear regression with bootstrapping for 5,000 repetitions to generate  
401 non-parametric confidence intervals (See **online supplemental file 3** for CEA details).

## 402 **Discussion**

403 The study commenced recruitment on June 5, 2023. This article presents the design of the  
404 Chinese KONTAKT™ CHILD trial, a feasibility wait-list RCT featuring the Chinese 16-session  
405 KONTAKT™ variant for autistic children. This design incorporates multiple data sources and  
406 diverse outcome assessment methods, facilitating a comprehensive exploration of outcome data  
407 feasibility from different perspectives. Furthermore, a systematic cultural adaptation process  
408 ensures the suitability, acceptability, and comprehensiveness of the Chinese KONTAKT™ version.  
409 Adhering to the ICAF framework, this study will guide the refinement of the Chinese  
410 KONTAKT™ version and future larger-scale evaluations, addressing the question of whether SSGT  
411 can be effectively implemented for Chinese school-aged autistic children.

412 While there are several strengths in the study design mentioned earlier, it's important to

413 acknowledge some limitations. Firstly, the study's single-site nature and its focus on autistic  
414 children in Guangzhou city may limit the generalisability of the findings. Additionally, certain  
415 measures planned for use in the study, such as the CRSES and the SCS-DAP, may have uncertain  
416 psychometric properties due to the lack of Chinese population data. However, this feasibility study  
417 aims to provide empirical data on the psychometrics of these measures. Another limitation is the  
418 absence of an active comparator, as the wait-list control could potentially overestimate treatment  
419 effects [53]. Nevertheless, this aligns with the prevailing situation in China. Furthermore, the study  
420 will collect data on parents' and children's readiness for change, allowing for an exploration of the  
421 "help-seeker" effects, following the recommendation by Cunningham and colleagues in 2013 [53].

422 As mentioned above, the final stage of the ICAF involves running a full-scale RCT trial to  
423 evaluate the efficacy of the Chinese version of KONTAKT™. Therefore, upon completing this  
424 feasibility study, the investigators will integrate all quantitative and qualitative results to decide  
425 whether a full-scale RCT trial will be progressed or redesigning another KONTAKT™ feasibility  
426 study will be needed. The following aspects will be considered: (1) participants and parents'  
427 acceptability and adherence rates, (2) participants and parents' feedback on demand for  
428 KONTAKT™, (3) trainers' feedback on implementing KONTAKT™ in Chinese clinical setting, (4)  
429 trainers' fidelity on implementing KONTAKT™, (5) the feasibility results of the processes for data  
430 collecting, and (6) considering the potential capacity of the intervention setting (human resources,  
431 materials, and equipment) on implementing a full-scale RCT regarding the sample size calculation  
432 for the primary outcome.



### 433 **Plans for dissemination of finding**

434       The findings of the Chinese KONTAKT™ CHILD trial will be submitted to peer-review  
435 journals for consideration. Abstracts will also be submit to both local and international conferences,  
436 and community-based lay abstracts will be written and disseminated to provide feedback for autism  
437 stakeholders in China.

## 438 **References**

- 439           1. American Psychiatric Association. Diagnostic and statistical manual of mental  
440 disorders. 5th ed., text rev.;2022.
- 441           2. Tillmann J, San Jose Caceres A, Chatham CH, et al. Investigating the factors  
442 underlying adaptive functioning in autism in the EU-AIMS Longitudinal European Autism  
443 Project. *Autism Res* 2019;12(4):645-57. <https://doi.org/10.1002/aur.2081>. Epub 2019 Feb  
444 12.
- 445           3. Zhou H, Xu X, Yan W, et al. Prevalence of Autism Spectrum Disorder in China: A  
446 Nationwide Multi-center Population-based Study Among Children Aged 6 to 12 Years.  
447 *Neurosci Bull* 2020;36(9):961-71. <https://doi.org/10.1007/s12264-020-00530-6>. Epub 2020  
448 Jul 02.
- 449           4. Gilmore R, Ziviani J, Chatfield MD, et al. Social skills group training in adolescents  
450 with disabilities: A systematic review. *Res Dev Disabil* 2022;125:104218.  
451 <https://doi.org/10.1016/j.ridd.2022.104218>. Epub 2022 Mar 21.
- 452           5. Kaat AJ, Lecavalier L. Group-based social skills treatment: A methodological review.  
453 *Res Autism Spectr Disord* 2014;8(1):15-24. <https://doi.org/10.1016/j.rasd.2013.10.007>.
- 454           6. Afsharnejad B, Black MH, Falkmer M, et al. The Methodological Quality and  
455 Intervention Fidelity of Randomised Controlled Trials Evaluating Social Skills Group  
456 Programs in Autistic Adolescents: A Systematic Review and Meta-analysis. *J Autism Dev*  
457 *Disord* 2023 <https://doi.org/10.1007/s10803-023-05893-z>. Epub 2023 Jan 22.

458 7. Gates JA, Kang E, Lerner MD. Efficacy of group social skills interventions for youth  
459 with autism spectrum disorder: A systematic review and meta-analysis. Clin Psychol Rev  
460 2017;52:164-81. <https://doi.org/10.1016/j.cpr.2017.01.006>. Epub 2017 Jan 29.

461 8. Wolstencroft J, Robinson L, Srinivasan R, et al. A Systematic Review of Group  
462 Social Skills Interventions, and Meta-analysis of Outcomes, for Children with High  
463 Functioning ASD. J Autism Dev Disord 2018;48(7):2293-307.  
464 <https://doi.org/10.1007/s10803-018-3485-1>. Epub 2018 Feb 10.

465 9. Zheng S, Kim H, Salzman E, et al. Improving Social Knowledge and Skills among  
466 Adolescents with Autism: Systematic Review and Meta-Analysis of UCLA PEERS(R) for  
467 Adolescents. J Autism Dev Disord 2021;51(12):4488-503.  
468 <https://doi.org/10.1007/s10803-021-04885-1>. Epub 2021 Jan 30.

469 10. Miller A, Vernon T, Wu V, et al. Social Skill Group Interventions for Adolescents  
470 with Autism Spectrum Disorders: a Systematic Review. Rev J Autism Dev Disord  
471 2014;1(4):254-65. <https://doi.org/10.1007/s40489-014-0017-6>.

472 11. Soares EE, Bausback K, Beard CL, et al. Social Skills Training for Autism  
473 Spectrum Disorder: a Meta-analysis of In-person and Technological Interventions. J Technol  
474 Behav Sci 2021;6(1):166-80. <https://doi.org/10.1007/s41347-020-00177-0>. Epub 2020 Nov  
475 24.

476 12. Kinnaird E, Stewart C, Tchanturia K. Investigating alexithymia in autism: A  
477 systematic review and meta-analysis. Eur Psychiatry 2019;55:80-89.  
478 <https://doi.org/10.1016/j.eurpsy.2018.09.004>. Epub 2018 Nov 07.

- 479 13. Tavernor L, Barron E, Rodgers J, et al. Finding out what matters: validity of quality  
480 of life measurement in young people with ASD. *Child Care Health Dev* 2013;39(4):592-601.  
481 <https://doi.org/10.1111/j.1365-2214.2012.01377.x>. Epub 2012 Apr 21.
- 482 14. Huggins CF, Donnan G, Cameron IM, et al. Emotional self-awareness in autism: A  
483 meta-analysis of group differences and developmental effects. *Autism* 2021;25(2):307-21.  
484 <https://doi.org/10.1177/1362361320964306>. Epub 2020 Nov 07.
- 485 15. Lee A, Peter Hobson R. Drawing self and others: How do children with autism  
486 differ from those with learning difficulties? *Br J Dev Psychol* 2006;24(3):547-65.  
487 <https://doi.org/10.1348/026151005X49881>.
- 488 16. Papangelo P, Pinzino M, Pelagatti S, et al. Human Figure Drawings in Children  
489 with Autism Spectrum Disorders: A Possible Window on the Inner or the Outer World. *Brain*  
490 *Sci* 2020;10(6) <https://doi.org/10.3390/brainsci10060398>. Epub 2020 Jun 27.
- 491 17. Kotroni P, Bonoti F, Mavropoulou S. Children with autism can express social  
492 emotions in their drawings. *Int J Dev Disabil* 2018;65(4):248-56.  
493 <https://doi.org/10.1080/20473869.2018.1434855>. Epub 2018 Feb 13.
- 494 18. Schweizer C, Knorth EJ, Spreen M. Art therapy with children with Autism  
495 Spectrum Disorders: A review of clinical case descriptions on ‘what works’. *The Arts in*  
496 *Psychotherapy* 2014;41(5):577-93. <https://doi.org/10.1016/j.aip.2014.10.009>.
- 497 19. Waller D. Art therapy for children: how it leads to change. *Clin Child Psychol*  
498 *Psychiatry* 2006;11(2):271-82. <https://doi.org/10.1177/1359104506061419>. Epub 2006 Nov  
499 08.

500 20. Albaum CS, Vashi N, Bohr Y, et al. A Systematic Review of Therapeutic Process  
501 Factors in Mental Health Treatment for Autistic Youth. *Clin Child Fam Psychol Rev*  
502 2023;26(1):212-41. <https://doi.org/10.1007/s10567-022-00409-0>. Epub 2022 Aug 24.

503 21. Bölte S. Social färdighetsträning i grupp med fokus på kommunikation och social  
504 interaktion vid autismspektrumtillstånd enligt Frankfurtmodellen (KONTAKT). Göttingen,  
505 Stockholm: Hogrefe; 2018.

506 22. Herbrecht E, Poustka F, Birnkammer S, et al. Pilot evaluation of the Frankfurt  
507 Social Skills Training for children and adolescents with autism spectrum disorder. *Eur Child*  
508 *Adolesc Psychiatry* 2009;18(6):327-35. <https://doi.org/10.1007/s00787-008-0734-4>. Epub  
509 2009 Jan 24.

510 23. Choque Olsson N, Flygare O, Coco C, et al. Social Skills Training for Children and  
511 Adolescents With Autism Spectrum Disorder: A Randomized Controlled Trial. *J Am Acad*  
512 *Child Adolesc Psychiatry* 2017;56(7):585-92. <https://doi.org/10.1016/j.jaac.2017.05.001>.  
513 Epub 2017 Jun 26.

514 24. Jonsson U, Olsson NC, Coco C, et al. Long-term social skills group training for  
515 children and adolescents with autism spectrum disorder: a randomized controlled trial. *Eur*  
516 *Child Adolesc Psychiatry* 2019;28(2):189-201. <https://doi.org/10.1007/s00787-018-1161-9>.  
517 Epub 2018 May 12.

518 25. Afsharnejad B, Falkmer M, Black MH, et al. KONTAKT(R) social skills group  
519 training for Australian adolescents with autism spectrum disorder: a randomized controlled  
520 trial. *Eur Child Adolesc Psychiatry* 2022;31(11):1695-713.

521 <https://doi.org/10.1007/s00787-021-01814-6>. Epub 2021 May 31.

522 26. Afsharnejad B, Falkmer M, Picen T, et al. "I Met Someone Like Me!": Autistic  
523 Adolescents and Their Parents' Experience of the KONTAKT(R) Social Skills Group  
524 Training. *J Autism Dev Disord* 2022;52(4):1458-77.

525 <https://doi.org/10.1007/s10803-021-05045-1>. Epub 2021 May 05.

526 27. Choque Olsson N, Rautio D, Asztalos J, et al. Social skills group training in  
527 high-functioning autism: A qualitative responder study. *Autism* 2016;20(8):995-1010.  
528 <https://doi.org/10.1177/1362361315621885>. Epub 2016 Feb 26.

529 28. Hodge DR, Jackson KF, Vaughn MG. Culturally sensitive interventions and health  
530 and behavioral health youth outcomes: a meta-analytic review. *Soc Work Health Care*  
531 2010;49(5):401-23. <https://doi.org/10.1080/00981381003648398>. Epub 2010 Jun 04.

532 29. Barrera M, Jr., Castro FG, Strycker LA, et al. Cultural adaptations of behavioral  
533 health interventions: a progress report. *J Consult Clin Psychol* 2013;81(2):196-205.  
534 <https://doi.org/10.1037/a0027085>. Epub 2012 Feb 01.

535 30. Bernal G, Bonilla J, Bellido C. Ecological validity and cultural sensitivity for  
536 outcome research: issues for the cultural adaptation and development of psychosocial  
537 treatments with Hispanics. *J Abnorm Child Psychol* 1995;23(1):67-82.  
538 <https://doi.org/10.1007/BF01447045>. Epub 1995 Feb 01.

539 31. Faregh N, Lencucha R, Ventevogel P, et al. Considering culture, context and  
540 community in mhGAP implementation and training: challenges and recommendations from  
541 the field. *Int J Ment Health Syst* 2019;13:58. <https://doi.org/10.1186/s13033-019-0312-9>.

542 Epub 2019 Aug 30.

543 32. Bolte S, Lawson WB, Marschik PB, et al. Reconciling the seemingly irreconcilable:  
544 The WHO's ICF system integrates biological and psychosocial environmental determinants  
545 of autism and ADHD: The International Classification of Functioning (ICF) allows to model  
546 opposed biomedical and neurodiverse views of autism and ADHD within one framework.  
547 Bioessays 2021;43(9):e2000254. <https://doi.org/10.1002/bies.202000254>. Epub 2021 Apr  
548 03.

549 33. Bishop-Fitzpatrick L, Kind AJH. A Scoping Review of Health Disparities in Autism  
550 Spectrum Disorder. J Autism Dev Disord 2017;47(11):3380-91.  
551 <https://doi.org/10.1007/s10803-017-3251-9>. Epub 2017 Aug 02.

552 34. Kang-Yi CD, Grinker RR, Beidas R, et al. Influence of Community-Level Cultural  
553 Beliefs about Autism on Families' and Professionals' Care for Children. Transcult Psychiatry  
554 2018;55(5):623-47. <https://doi.org/10.1177/1363461518779831>. Epub 2018 Jul 05.

555 35. Ravindran N, Myers BJ. Cultural Influences on Perceptions of Health, Illness, and  
556 Disability: A Review and Focus on Autism. J Child Fam Stud 2012;21(2):311-19.  
557 <https://doi.org/10.1007/s10826-011-9477-9>.

558 36. Clark E, Zhou Z, Du L. Autism in China: Progress and challenges in addressing the  
559 needs of children and families. Int J Sch Educ Psychol 2019;7(2):135-46.  
560 <https://doi.org/10.1080/21683603.2019.1570885>.

561 37. Aarons GA, Green AE, Palinkas LA, et al. Dynamic adaptation process to  
562 implement an evidence-based child maltreatment intervention. Implement Sci 2012;7:32.

563 <https://doi.org/10.1186/1748-5908-7-32>. Epub 2012 Apr 20.

564 38. Highfield L, Hartman MA, Mullen PD, et al. Intervention Mapping to Adapt  
565 Evidence-Based Interventions for Use in Practice: Increasing Mammography among African  
566 American Women. *Biomed Res Int* 2015;2015:160103. <https://doi.org/10.1155/2015/160103>.  
567 Epub 2015 Nov 21.

568 39. Thabane L, Lancaster G. A guide to the reporting of protocols of pilot and  
569 feasibility trials. *Pilot Feasibility Stud* 2019;5:37.  
570 <https://doi.org/10.1186/s40814-019-0423-8>. Epub 2019 Mar 13.

571 40. Chan AW, Tetzlaff JM, Altman DG, et al. SPIRIT 2013 statement: defining standard  
572 protocol items for clinical trials. *Ann Intern Med* 2013;158(3):200-7.  
573 <https://doi.org/10.7326/0003-4819-158-3-201302050-00583>. Epub 2013 Jan 09.

574 41. Grant S, Mayo-Wilson E, Montgomery P, et al. CONSORT-SPI 2018 Explanation  
575 and Elaboration: guidance for reporting social and psychological intervention trials. *Trials*  
576 2018;19(1):406. <https://doi.org/10.1186/s13063-018-2735-z>. Epub 2018 Aug 01.

577 42. Zhang H. The revision of WISC-IV Chinese version. *Psychological Science*  
578 2009;32(5):1177-79. <https://doi.org/>

579 43. Lord C, Rutter M, Le Couteur A. Autism Diagnostic Interview-Revised: a revised  
580 version of a diagnostic interview for caregivers of individuals with possible pervasive  
581 developmental disorders. *J Autism Dev Disord* 1994;24(5):659-85.  
582 <https://doi.org/10.1007/BF02172145>. Epub 1994 Oct 01.

583 44. Su L, Li X, Wan G, et al. The norms of achenbach child behavior checklist in hunan



- 584 province. Chin J Clin Psychol 1996;4(1):24-28. <https://doi.org/>
- 585 45. Thornton CS, Tsai WH, Santana MJ, et al. Effects of Wait Times on Treatment  
586 Adherence and Clinical Outcomes in Patients With Severe Sleep-Disordered Breathing: A  
587 Secondary Analysis of a Noninferiority Randomized Clinical Trial. JAMA Netw Open  
588 2020;3(4):e203088. <https://doi.org/10.1001/jamanetworkopen.2020.3088>. Epub 2020 Apr  
589 21.
- 590 46. Robiner WN. Enhancing adherence in clinical research. Contemp Clin Trials  
591 2005;26(1):59-77. <https://doi.org/10.1016/j.cct.2004.11.015>.
- 592 47. Lauritsen J, Bruus M. EPIDATA: Data entry system for use with Stata, SPSS, SAS,  
593 Excel, text formats. 2000 <https://doi.org/>
- 594 48. Rabin SJ, Laugeson EA, Mor-Snir I, et al. An Israeli RCT of PEERS(R):  
595 Intervention Effectiveness and the Predictive Value of Parental Sensitivity. J Clin Child  
596 Adolesc Psychol 2021;50(6):933-49. <https://doi.org/10.1080/15374416.2020.1796681>. Epub  
597 2020 Aug 12.
- 598 49. Whitehead AL, Julious SA, Cooper CL, et al. Estimating the sample size for a pilot  
599 randomised trial to minimise the overall trial sample size for the external pilot and main trial  
600 for a continuous outcome variable. Stat Methods Med Res 2016;25(3):1057-73.  
601 <https://doi.org/10.1177/0962280215588241>. Epub 2015 Jun 21.
- 602 50. McCoy CE. Understanding the Intention-to-treat Principle in Randomized  
603 Controlled Trials. West J Emerg Med 2017;18(6):1075-78.  
604 <https://doi.org/10.5811/westjem.2017.8.35985>. Epub 2017 Nov 01.

605                    51. Yang P, Chen G, Wang P, et al. Psychometric evaluation of the Chinese version of  
606                    the Child Health Utility 9D (CHU9D-CHN): a school-based study in China. Qual Life Res  
607                    2018;27(7):1921-31. <https://doi.org/10.1007/s11136-018-1864-x>. Epub 2018 May 08.

608                    52. Yang Z, Jiang J, Wang P, et al. Estimating an EQ-5D-Y-3L Value Set for China.  
609                    Pharmacoeconomics 2022;40(Suppl 2):147-55. <https://doi.org/10.1007/s40273-022-01216-9>.  
610                    Epub 2022 Nov 18.

611                    53. Cunningham JA, Kypri K, McCambridge J. Exploratory randomized controlled  
612                    trial evaluating the impact of a waiting list control design. BMC Med Res Methodol  
613                    2013;13:150. <https://doi.org/10.1186/1471-2288-13-150>. Epub 2013 Dec 10.

614

## 615 **Footnotes**

### 616 **Authors' contributions**

617 LU, ZH, ZX, SB, and SG undertook the conceptualization and design of the study. LU, ZH,  
618 BW translated the manuals and workbooks. LU, ZH, SB, SG, and ZX selected the measures used.  
619 BW, FJ, YP, HX, ZH, LU, and ZX improved the content of the manual. FJ, YP, ZH, and ZX assist  
620 with administration of groups and offer clinical support. LU drafted the manuscript, with inputs  
621 from ZH, SB, SG, and ZX. All authors contributed to, read and approved the final manuscript.

### 622 **Funding statement**

623 This research received no specific grant from any funding agency in the public, commercial or  
624 non-profit sectors.

### 625 **Competing interests**

626 All authors declare that they have no conflicts of interest.

### 627 **Ethics approval**

628 This study has been approved by the Ethical Board Committee at the Third Affiliated Hospital  
629 of Sun Yat-sen University (II2023-119-01), and pre-registered in Chinese Clinical Trials  
630 (ChiCTR2300072136).

631 **Availability of data and materials**

632 The ethical consent and funding documents have been reviewed by the review board of the  
633 Chinese Clinical Trial Registry and are available for review by the Editorial Office. Anonymised  
634 data related to this study will be available from the corresponding author upon reasonable request  
635 after study completion and publication of the study. The final dataset generated during this study  
636 will upload to the Research Data Deposit of Sun Yat-sen University. Trial results will be reported  
637 and published in scientific journals.

638

639 **Acknowledgments**

640 We acknowledge the generous support from the Swedish team at Karolinska  
641 Institutet/Stockholm Health Services and the Australian team at Curtin University. They facilitated  
642 the training, provided precious experiences and materials for the CDBC KONTAKT™ trainers . We  
643 thanks the CDBC KONTAKT™ team for facilitating the process of this trial. We sincerely thank  
644 the autistic individual, Yihan Liu, and her families for validating the translation and contents of the  
645 Chinese KONTKAT™ manual. Additionally, we appreciate Yan Li for designing the KONTAKT™  
646 China tools.

647

648 **Tables**

649 **Table 1.** Schedule of enrolment, interventions, and assessments for the study

|                               | Involvement <sup>a</sup> |   |   |   |   | STUDY PERIOD |            |                                                                                       |                                                                                       |    |    |    |
|-------------------------------|--------------------------|---|---|---|---|--------------|------------|---------------------------------------------------------------------------------------|---------------------------------------------------------------------------------------|----|----|----|
|                               |                          |   |   |   |   | Enrolment    | Allocation | Post-allocation                                                                       |                                                                                       |    |    |    |
|                               | C                        | P | T | E | F |              |            |                                                                                       |                                                                                       |    |    |    |
| TIME POINTS <sup>b</sup>      |                          |   |   |   |   | -T1          | 0          | T1                                                                                    | T2                                                                                    | T3 | T4 | T5 |
| <b>ENROLMENT:</b>             |                          |   |   |   |   |              |            |                                                                                       |                                                                                       |    |    |    |
| Eligibility Screen            |                          |   |   | X |   | X            |            |                                                                                       |                                                                                       |    |    |    |
| Informed consent              |                          |   |   | X |   | X            |            |                                                                                       |                                                                                       |    |    |    |
| Allocation                    |                          |   |   |   |   |              | X          |                                                                                       |                                                                                       |    |    |    |
| <b>INTERVENTIONS</b>          |                          |   |   |   |   |              |            |                                                                                       |                                                                                       |    |    |    |
| (KONTAKT <sup>TM</sup> ):     |                          |   |   |   |   |              |            |                                                                                       |                                                                                       |    |    |    |
| <i>Immediate Intervention</i> | X                        | X | X | X | X |              |            |  |                                                                                       |    |    | X  |
| <i>Delay Intervention</i>     | X                        | X | X | X | X |              |            | X                                                                                     |  |    |    |    |
| <b>ASSESSMENTS:</b>           |                          |   |   |   |   |              |            |                                                                                       |                                                                                       |    |    |    |
| CBCL                          |                          | X |   |   |   | X            |            |                                                                                       |                                                                                       |    |    |    |
| WISC-IV                       | X                        |   |   | X |   | X            |            |                                                                                       |                                                                                       |    |    |    |
| ADOS-G                        | X                        |   |   | X |   | X            |            |                                                                                       |                                                                                       |    |    |    |
| STI                           |                          | X |   | X |   | X            |            |                                                                                       |                                                                                       |    |    |    |
| <b>Screening</b>              |                          |   |   |   |   |              |            |                                                                                       |                                                                                       |    |    |    |

|                           |             |   |   |   |   |   |  |  |  |   |   |   |   |   |
|---------------------------|-------------|---|---|---|---|---|--|--|--|---|---|---|---|---|
|                           | SFI         | X | X |   | X |   |  |  |  |   |   |   |   |   |
|                           | SES         |   | X |   |   | X |  |  |  |   |   |   |   |   |
| <b>Primary Outcome</b>    | CASS (+CRS) | X |   |   | X |   |  |  |  | X |   | X | X |   |
| <b>Secondary Outcome</b>  | SRS-2       |   | X | X |   |   |  |  |  | X |   | X | X |   |
|                           | CRSES       | X |   |   |   |   |  |  |  | X |   | X | X |   |
|                           | Koppitz     | X |   |   | X |   |  |  |  | X |   | X | X |   |
|                           | DAPT        |   |   |   |   |   |  |  |  |   |   |   |   |   |
|                           | SCS-DAP     | X |   |   | X |   |  |  |  | X |   | X | X |   |
|                           | CORS        | X |   |   |   |   |  |  |  |   |   |   |   |   |
|                           | PRFQ        |   | X |   |   |   |  |  |  | X |   | X | X |   |
|                           | ABAS-2      |   | X | X |   |   |  |  |  | X |   | X | X |   |
|                           | PSS         |   | X |   |   |   |  |  |  | X |   | X | X |   |
| STARSS                    | X           |   |   | X |   |   |  |  |  |   |   |   |   |   |
| <b>Processing Factors</b> | TPOCS       | X |   |   | X |   |  |  |  | X | X | X | X | X |
|                           | PPKS        | X | X |   |   | X |  |  |  |   |   |   |   |   |
|                           | TASC        | X | X |   |   | X |  |  |  | X | X | X | X | X |
| <b>Fidelity Outcome</b>   | Attendance  | X | X |   |   | X |  |  |  |   |   |   |   |   |
|                           | HCR         | X |   |   |   | X |  |  |  |   |   |   |   |   |
|                           | Focus Group | X | X |   |   | X |  |  |  |   | X |   | X |   |

|                                   |         |   |   |  |   |  |  |           |
|-----------------------------------|---------|---|---|--|---|--|--|-----------|
|                                   | KFC     |   |   |  | X |  |  |           |
|                                   | GSRS    | X |   |  |   |  |  |           |
|                                   | TFAQ    |   | X |  |   |  |  | X X X X X |
|                                   | NEQ     |   | X |  |   |  |  | X X       |
| <i>Cost-effectiveness Outcome</i> | TIC-PK  |   | X |  |   |  |  | X X X X X |
|                                   | CHU9D   | X |   |  |   |  |  | X X X X X |
|                                   | EQ-5D-Y |   | X |  |   |  |  | X X X X X |

a: Involvement: C: Child; P: Parent; T: Teacher; E: Evaluator blinded to the hypothesis; F: Trainer.

b: Time points: T1: Time 1; T2: Time 2; T3: Time 3; T4: Time 4; T5: Time 5.

Measures: ABAS-2: Adaptive Behaviour Assessment System-II; ADOS-G: Autism Diagnostic Observation Scale-Generic; CASS+CRS: Contextual Assessment of Social Skills + Conversation Rating Scale; CBCL: Child Behaviour Checklist; CHU9D: Child Health Utility 9D; CORS: Child Outcome Rating Scale; GSRS: Group Session Rating Scale; KFC: KONTAKT™ Fidelity Checklist; Koppitz DAPT: Koppitz Draw-A-Person Test; NEQ: Negative Effects Questionnaire; PPKS: Preparedness for Participating KONTAKT™ Scale; PRFQ: Parental Reflective Functioning Questionnaire; PSS: Perceived school support; TASC: Therapeutic Alliance Scales for Children; TFAQ: Theoretical Framework of Acceptability Questionnaire; TCI-PK: Trimbos/iMTA questionnaire for patients with a psychiatric disorder child version; SCS-DAP: Self-Concept Scale-Draw-A-Person; SES: Socioeconomic Status Scale; SFI: Screening Face Interview; STARSS: Snack Time Assessment of Relationships and Social Skills; STI: Screening Telephone Interview;

---

SRS-2: Social Responsiveness Scale-2; WISC-IV: Wechsler Intelligence Scale for Children-IV

Chinese version.

650



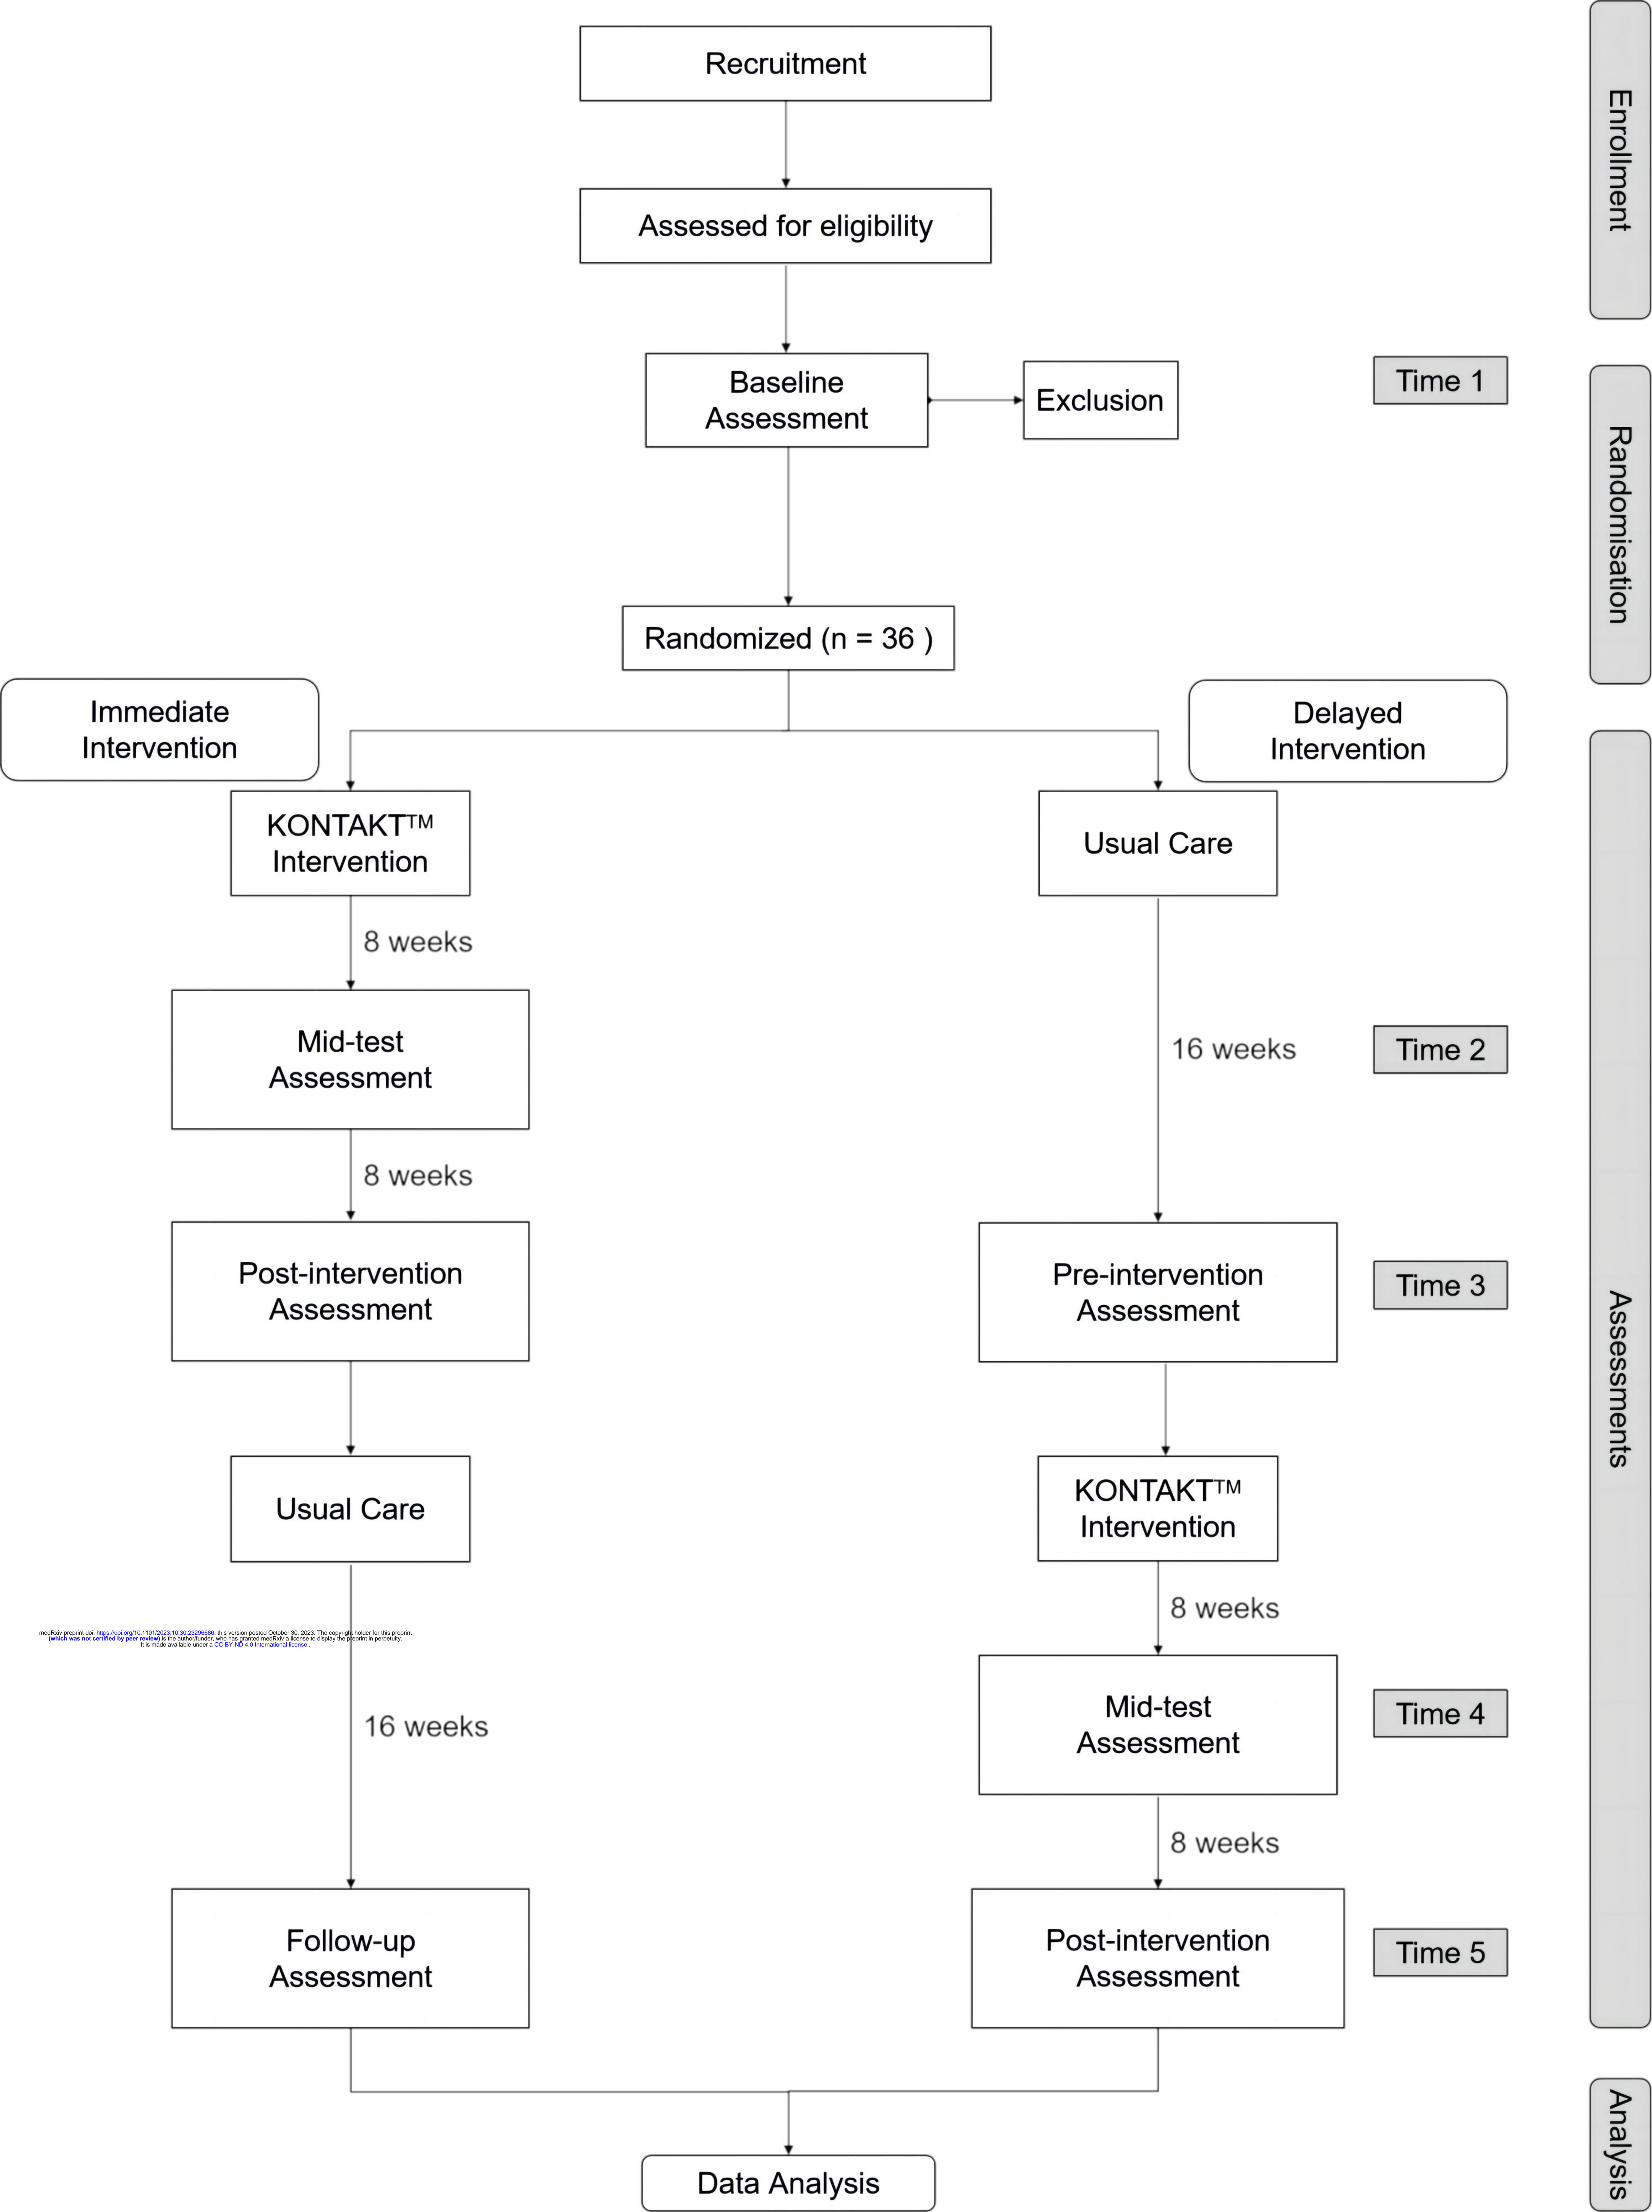

medRxiv preprint doi: <https://doi.org/10.1101/2023.10.30.23290596>; this version posted October 30, 2023. The copyright holder for this preprint (which was not certified by peer review) is the author/funder, who has granted medRxiv a license to display the preprint in perpetuity. It is made available under a CC-BY-ND 4.0 International license.

## Goals

- Social communication and interaction skills
- Social motivation
- Social cognition
- Social competence
- Self-confidence
- Awareness of self and others
- Problem-solving strategies
- Emotion recognition and expression

## Session Structure

- Opening Round
- Homework Review
- Thematic Discussion
- Group Activities
- Snack Time
- New Homework Assignment
- Closing Round

## Overall Structure

- 16 weekly 60-minute sessions facilitated by 2-3 therapists with 4-6 children per group
- 3 sessions include parent meeting facilitated by one therapist
- Session 1-11 fixed themes and similar homework
- Session 12-15 individualised themes and homework
- Session 16 summary and graduation

## Essential Elements

- Principles of CBT
- Behavioural activation
- Psychoeducation
- Observational learning
- Computerised social cognition training
- Parental involvement

**KONTAKT™**
