# 1 Feasibility and cross-cultural validation of an 2 adapted social skills group training programme 3 (KONTAKT™ CHILD) for Chinese autistic 4 children: a wait-list RCT protocol

## 5 Authors and Affiliations

6 Uchong Lao<sup>1†</sup> · Huilin Zhu<sup>1\*</sup> · Fengjing Liang<sup>1</sup> · Enid Wuxia Bai<sup>12</sup> · Peipei Yin<sup>1</sup> · Xiaoqian Huang<sup>1</sup> ·  
7 Sonya Girdler<sup>23</sup> · Sven Bölte<sup>234</sup> · Xiaobing Zou<sup>1\*</sup>

8 <sup>1</sup> Child Development and Behavior Center, The Third Affiliated Hospital, Sun Yat-Sen University,  
9 China, 2693 Kai Chuang Avenue, Huangpu District, Guangzhou, 510530, China

10 <sup>2</sup> Curtin Autism Research Group, School of Allied Health, Curtin University, Kent Street, Bentley,  
11 Perth, Western Australia

12 <sup>3</sup> Center of Neurodevelopmental Disorders (KIND), Centre for Psychiatry Research, Division of  
13 Neuropsychiatry, Department of Women's and Children's Health, Karolinska Institutet &  
14 Stockholm Health Care Services, Region Stockholm, Stockholm, Sweden

15 <sup>4</sup> Child and Adolescent Psychiatry, Stockholm Health Care Services, Region Stockholm, Stockholm,  
16 Sweden

17

18

19 **NOTE:** This preprint reports new research that has not been certified by peer review and should not be used to guide clinical practice.

20 <sup>†</sup> Equal contributions

21 \* Corresponding authors

22 ORCID ID:

23 Uchong Lao: 0000-0001-8658-880X

24 Huilin Zhu: 0000-0002-1052-708X

25 Sonya Girdler: 0000-0001-7992-0800

26 Sven Bölte: 0000-0002-4579-4970

27

28 **Corresponding authors information:**

29 **Huilin Zhu**

30 Email: zhuhlin6@mail.sysu.edu.cn

31

32 **Xiaobing Zou**

33 Email: zouxb@mail.sysu.edu.cn

34

## 35 **Abstract**

### 36 **Introduction**

37 School-aged autistic children commonly experience social communication and interaction  
38 challenges in their everyday lives. While international evidence suggests that social skills group  
39 training (SSGT) programmes can support autistic children, improving their psycho-social  
40 functioning, to date there is no standardised evidence-based SSGT tailored towards the needs of  
41 autistic children aged 8 to 12 years living in the Chinese Mainland. Therefore, this study will  
42 evaluate the feasibility, acceptability, as well as preliminary efficacy, and cost-effectiveness of a  
43 culturally-adapted 16-session version of the social skills programme KONTAKT™ in Chinese  
44 autistic children.

### 45 **Methods and analysis**

46 This study will employ a randomised, single-blinded, wait-list controlled feasibility design  
47 with 36 Chinese autistic children aged 8 to 12 years with Intelligence Quotient over 70 referred to  
48 the Child Development Behaviour Centre, in Guangzhou, China. Participants will be randomly  
49 assigned to either the immediate training group or the delayed training group stratified by sex.  
50 Feasibility will be assessed using quantitative and qualitative data obtained from the KONTAKT™  
51 CHILD participants, their parents, and facilitators of the programme. Preliminary efficacy and  
52 cost-effectiveness are assessed via quantitative data obtained at five time points. The primary  
53 outcome is participants' improvement in social skills as measured by the Contextual Assessment of  
54 Social Skills (CASS). Other outcomes include parents' and teachers' reports of participants' autistic

55 traits and adaptive functioning, participants' self-report and projective tests for self-assertiveness  
56 and psycho-social functioning, and parent reports on parental reflective functioning and perceived  
57 school support. Common process factors and their effects on outcomes will also be explored.  
58 Cost-effectiveness will consider both societal and healthcare perspectives.

## 59 **Ethics and dissemination**

60 The current study protocol has been reviewed and ethics approval has been obtained from the  
61 Ethical Board Committee at the Third Affiliated Hospital of Sun Yat-sen University (II2023-119-01).  
62 The trial was pre-registered in Chinese Clinical Trials (ChiCTR2300072136) on 2023 June 05. The  
63 results of this trial will be actively disseminated through peer-reviewed publications and conference  
64 presentations. Any identifiable personal information will be anonymised to protect confidentiality.

## 65 **Protocol version**

66 1.0, 2023 March 02

## 67 **Keywords**

68 Social skills group training; Children; KONTAKT™; Cross-cultural adaptation; Feasibility; Autism;  
69 Chinese

## 70 **Strengths and limitations of this study**

- 71 ●Comprehensive assessment of diverse outcomes via multiple informants.
- 72 ●Systematic cultural adaptation using the Integrative Cultural Adaptation Framework (ICAF)

ensuring the appropriateness of the Chinese version of KONTAKT™.

- Collect data on readiness for change, providing insights into “help-seeker” effects.

- Limited generalisability due to a single study site, location-specific inclusion, and absence of an active comparator.

- Given the absence of previous research examining the efficacy of SSGT programs in autistic children in the Chinese Mainland, this study is appropriately a feasibility study. As such, only the preliminary efficacy of KONTAKT™ with this population in a small sample will be examined. The small sample size will limit the power of the study in examining the effect of moderators on the study outcomes.

## 82 Introduction

### 83 Background and rationale

84 Autism<sup>1</sup> is a neurodevelopmental condition characterised by persistent challenges in  
 85 reciprocal social interaction and communication [1]. Autistic children often struggle to comply with  
 86 social expectations and norms of communication and interaction, impacting their functioning in  
 87 everyday contexts [2]. The estimated prevalence of autism among children aged 6 to 12 in the  
 88 Chinese Mainland is 0.7% (~ 1 in 143 children) and nearly half of all autistic children attend  
 89 mainstream schools [3]. While there is limited research investigating the experiences of these  
 90 children, their families and teachers, there is a clear and urgent need for evidence-based  
 91 interventions aiming to support the social competence and well-being of Chinese autistic children in  
 92 their everyday lives.

93 Internationally, Social Skills Group Training (SSGT) programmes are demonstrating efficacy in  
 94 supporting verbal and cognitively able school-aged autistic children in developing their social skills  
 95 [4, 5, 6]. SSGTs facilitate socio-emotional development and promote well-being in autistic children  
 96 by explicitly and implicitly supporting autistic children in interacting with peers and participating in  
 97 society more broadly [7]. SSGTs also leverage the benefits of learning in a group, with  
 98 opportunities for peer learning and support. Multiple meta-analyses of randomised controlled trials  
 99 (RCTs) evaluating the efficacy of these programmes in autistic youth report moderate to large effect  
 100 sizes in achieving personally meaningful social goals, enhancing social skills, social skills

<sup>1</sup> Herein, identity-first language is used since this is the endorsed terminology among autistic advocates (Kenny, 2016).

101 knowledge, social participation, and social functioning [4, 8, 9, 10].

102 While there has been considerable investigation on the proximal intervention outcomes of  
 103 SSGT programmes in autistic children and adolescents and post-test and short-term follow-up  
 104 periods, there has been limited focus on longer-term outcomes and the generalisation of learnt skills  
 105 to everyday contexts such as schools. Further, with few exceptions, the outcomes of these  
 106 programmes have been largely assessed by parents. This is of particular concern given that most  
 107 study designs have not employed single-blinded observation of outcome measures [4, 8]. Results  
 108 from previous meta-analyses [4, 8, 11, 12] infer that improvements observed in parent and clinical  
 109 ratings were primarily related to increased social skills knowledge or specific task-related skills,  
 110 rather than assessments of the generalisation of skills to everyday contexts [8].

111 SSGT programmes have also been criticised for failing to consider the view of autistic  
 112 youth themselves in the design and delivery of the programmes [13]. While capturing and  
 113 accounting for the views of autistic young people may require effort, given their communication  
 114 challenges [14], increasingly autistic advocates and the Autistic community are calling for  
 115 researchers and clinicians to consider and incorporate their views in clinical interventions [15]. It is  
 116 also likely that co-producing SSGT with individuals with lived experience will enhance the efficacy  
 117 of these programmes in relation to the intended target group [16]. Further, given the inherent  
 118 challenges experienced by autistic children in understanding social interactions and emotional  
 119 content, questions have been raised regarding the validity and accuracy of self-report questionnaires  
 120 aiming to evaluate the impact of SSGT programmes on these children [17]. Despite these cautions,  
 121 findings from a recent meta-analysis suggest that the emotional self-awareness of school-aged

autistic children is comparable to their non-autistic peers [18]. It seems plausible that approaches tailored to the communication needs and preferences of autistic children will be more successful in gathering their perspectives [19]. Further, while unusual in SSGT or autism research context, validated non-verbal psychometric assessments, such as the Draw-A-Person Test [DAPT] [20, 21], may be a worthwhile tool for understanding children's psycho-social functioning [22, 23, 24].

Methodological limitations of previous SSGT efficacy studies include a failure to consider common process factors [25]. Process factors are elements that are inherently present in receiving and delivering a health intervention, that unfold progressively throughout its delivery and include participants' expectations, willingness to participate, and the alliance between participants and facilitators. While a significant proportion of SSGT studies have reported programme adherence and satisfaction [8], the data obtained by these studies were largely descriptive and failed to systematically examine the impact of process factors in relation to intervention outcomes [25].

The KONTAKT™ programme is a well-established SSGT designed for autistic children and adolescents with and without cooccurring conditions [26]. Originating in Germany [27], it has now been further developed, standardised, culturally adapted, and evaluated in Sweden [28, 29] and Australia [30]. Three session-length variants (24-session, 16-session, and 12-session) have been standardised and evaluated through RCTs, demonstrating efficacy and effectiveness in improving participants' social functioning, adaptive functioning, emotional well-being, emotion recognition and regulation, as well as accomplishment of personally-meaningful social goals [28, 29, 30]. Findings across these studies suggest that KONTAKT™ may be particularly beneficial to autistic teenagers and girls. Moreover, both quantitative and qualitative data support the conclusion that



143 KONTAKT™ is effective, safe, and well-received by autistic youth [28, 29, 30, 31, 32].

144 To our knowledge, while a standardised SSGT programme PEERS® has been tailored for  
145 use with Chinese autistic adolescents [33], there is no culturally standardised SSGT programme  
146 specifically tailored toward the needs of autistic children years in the Chinese Mainland. With its  
147 diverse, individualised, and naturalistic session design [26], it is anticipated that KONTAKT™ will  
148 effectively support the social functioning and well-being of Chinese autistic children, provided the  
149 context of Chinese culture and its associated social norms are incorporated [34].

150 Cultural adaptation involves systematically modifying an evidence-based intervention to  
151 align with the target population’s needs, values, languages, conditions, and customs [35, 36, 37].  
152 However, only a few cultural adaptation studies on SSGT have well-documented and theoretically  
153 based methodologies. Moreover, previous SSGT efficacy studies generally lacked input from the  
154 target population, despite language translation and the inclusion of culturally relevant content [6].

155 Ignoring cultural differences can significantly hamper the effectiveness of evidence-based  
156 SSGTs for autistic individuals [34]. Given the core characteristics of autism involve social  
157 interaction and communication, social-ecological differences across cultures will undoubtedly  
158 influence interpretations of “functioning” and “disorder” in autism [38]. Cultural factors also impact  
159 established expectations and interactions between families and service providers, and between  
160 service providers in various sectors including healthcare, education, and the broader community [39,  
161 40, 41].

162 For example, Chinese parents are unlikely to disclose their child’s autism diagnosis to  
163 school, reflecting the limited collaboration between family-school, prevailing autism stereotypes

164 and fears regarding stigma [42]. Moreover, Chinese autistic children are commonly not informed of  
 165 their autism diagnosis, with the majority of parents choosing not to disclose the diagnosis to them  
 166 [43]. There are also clear differences in the prevailing service delivery paradigms relevant to  
 167 supporting autistic children in the Chinese Mainland compared to many Western countries. Service  
 168 delivery in the Chinese Mainland is significantly impacted by a large population, and limited health  
 169 professionals and public health services [44, 45]. Unlike many Western countries, where funding  
 170 and child health services for autistic children are commonly provided by governmental departments,  
 171 the Chinese Mainland relies primarily on parents to cover these costs [46].

172 While there are various cultural adaptation frameworks guiding the alignment of health  
 173 interventions with the needs of a target population [35, 36, 47, 48], despite some methodological  
 174 distinctions, they share many similarities. In aligning the KONTAKT™ SSGT programme with the  
 175 needs of autistic children living in the Chinese Mainland, this study adopts the integrative cultural  
 176 adaptation framework (ICAF) [35]. The ICAF involves five stages: information gathering,  
 177 preliminary design, preliminary efficacy testing, refinement, and final trial. This study focuses on  
 178 the first four stages of the ICAF, in preparing for final evaluation trial (the last stage).

## 179 **Objectives and hypotheses**

180 The overarching purpose of the present study is to assess the feasibility and cross-cultural  
 181 validity of the adapted 16-session version of the KONTAKT™ CHILD programme for Chinese  
 182 autistic children in preparation for a larger RCT trial. The specific objectives are:

183 1. Evaluating the integration of KONTAKT™ CHILD programme into a tertiary

hospital's routine activity;

2. Assessing the acceptability and feasibility of the data collection framework;

3. Examining the preliminary efficacy, quantitative and qualitative effects of

KONTAKT™;

4. Exploring the impact of common process factors on intervention outcomes; and,

5. Examining the cost-effectiveness of KONTAKT™ CHILD compared to standard care.

Our primary hypothesis is that the Chinese 16-session KONTAKT™ CHILD programme

will be feasible and culturally appropriate for Chinese autistic children with minor revisions and can be successfully implemented in a tertiary clinic. We also hypothesise that participants in the immediate training group (ITG), in comparison to the delayed training group (DTG) [wait-list], will experience greater improvements in outcomes from Time 1 to Time 3 (waiting period of DTG). We expect that participants and their parents with higher readiness for change and a stronger alliance in the ITG will benefit more from KONTAKT™ CHILD. Moreover, we anticipate that the training effects in the ITG will persist at follow-up, and significant improvements in children's outcomes will occur in the DTG from Time 3 to Time 5 (training endpoint of the DTG). For cost-effective analysis, we hypothesise that the additional costs for KONTAKT™ will be offset by participants' improvement in health-related quality of life and out-of-pocket savings in the use of other mental health and psychiatric services.

## Trial Design

This study was approved by the Ethical Board Committee at the Third Affiliated Hospital of

204 Sun Yat-sen University (II2023-119-01) and preregistered in Chinese Clinical Trials  
205 (ChiCTR2300072136).

206 Any modification to this protocol will be reported to the ethical board and updated in Chinese  
207 Clinical Trials. Following Thabane and Lancaster's guidelines in 2019 [49], this Chinese  
208 KONTAKT™ CHILD protocol is planned and reported following the Standard and Protocol Items:  
209 Recommendations for Interventional Trials (SPIRIT) [50]. The findings of this study will be reported  
210 adherent to the Consolidated Standards of Reporting Trials for Social and Psychological  
211 Interventions (CONSORT-SPI) [51].

212 The Chinese KONTAKT™ CHILD feasibility study has a prospective, wait-list controlled,  
213 single-site, stratified, randomised design. Blinding will apply to data collection, outcome  
214 adjudicators, and data analysts. All electronic files, including coding videos and scanned drawings,  
215 will be named without identifying personal information and group allocation or time-point  
216 information. Three major assessment time-points (ITG: Pre-training [T1], Post-training [T3], and  
217 Follow-Up [T5]; DTG: Pre-training [T1], Pre-training [T3], Post-training [T5]), with additional  
218 mid-point cost and processing factors data collection for each group, are included. Additional  
219 mid-point cost data collection follows the two-month follow-up intervals recommended by the  
220 Treatment Inventory of Costs in Patients with Psychiatric Disorders - Child version (TiC-PC)  
221 manual [52]. Measurements will be taken during face-to-face meetings, with the exception of data  
222 from teachers and the prescreening process. Further, this study will employ a mixed-methods design,  
223 with both between-group and within-participant comparisons, to explore the feasibility,  
224 acceptability of implementing a large-scale RCT, and the preliminary efficacy of the Chinese

KONTAKT™ CHILD programme. Randomisation is performed at a 1:1 allocation ratio, with variable block length and stratification by sex. Participant recruitment and training are ongoing between 2023 June 5 and 2025 March 1.

## Methods: participants, interventions, and outcomes

### Study setting

All in-person assessments and interventions, except for the excursion session, will take place at the outpatient department of the Child Development and Behaviour Centre (CDBC) of the tertiary academic hospital, the Third-affiliated Hospital of Sun Yat-sen University, in Guangzhou, China. The CDBC is one of China's first established and leading developmental behavioural paediatric units, with over 20 years of experience in diagnosing and promoting the well-being of autistic individuals and their families. The CDBC provides over 10,000 clinic appointments annually to neurodivergent children and their families across China seeking diagnostic and intervention services.

Online assessments will be designed using the SurveyStar online survey platform (<https://wjx.cn/>). The SurveyStar is one of the most popular electronic survey platforms in Chinese contexts, with its services covering more than three million enterprises and 90% of universities in China.

Due to limited email use in the Chinese Mainland, WeChat®, the dominant instant messaging and media app, will be the primary channel for participant recruitment, communication with families, and online survey distribution. Additionally, the SurveyStar conveniently integrates with

245 WeChat<sup>®</sup> through a Mini Programme [53], allowing WeChat<sup>®</sup> users to seamlessly complete  
246 questionnaires directly on the platform.

247 The KONTAKT<sup>™</sup> certified trainers are experienced CBDC clinicians (clinical psychologists,  
248 developmental behavioural paediatricians, and therapists) working with Chinese autistic children  
249 (with 3 to 10 years of working experience). They have completed standardised online KONTAKT<sup>™</sup>  
250 methodological training provided by experienced trainers from the Center of Neurodevelopmental  
251 Disorders at Karolinska Institutet (KIND), including self-directed training and video-conference  
252 seminars, followed by a 13-session enhanced in-person training. The enhanced training course  
253 mainly included trainers role-playing the child sessions, and more in-depth discussion on the  
254 principles of KONTAKT<sup>™</sup>.

255 All KONTAKT<sup>™</sup> CHILD sessions, except for the excursion session, will be delivered in a  
256 spacious, well-lit room at CDBC, with participants and trainers sitting in a circle. As suggested in  
257 the KONTAKT<sup>™</sup> manual, delivery of the programme content will be supported by a flipchart,  
258 utilised to record notes during each session, and a board displaying the group rules, session agenda,  
259 and points assigned to participants in recognition of their participation in the sessions. The  
260 excursion session (session 9) will be to a café, a bubble tea shop, or a convenience store, accessible  
261 from CDBC. Parent sessions will take place in a separate room, with parents sitting together in a  
262 circle without their children present. A projector will be utilised to present information on the  
263 principles and the content of KONTAKT<sup>™</sup>, and information pertaining to their role, such as  
264 completing assignments and providing constructive feedback, in supporting their children during  
265 the intervention period.

## 266 Recruitment

267 **Figure 1** displays the flow of participants throughout the study. Thirty-six autistic children will  
268 be recruited through the outpatient department of the CDBC. Multiple recruitment avenues will be  
269 utilised including word-of-mouth, referrals from clinicians, posters displaying information about the  
270 study at the CDBC clinic, and flyers published on the WeChat<sup>®</sup> account of CDBC  
271 (<https://www.wechat.com/>).

272 Parents will express their interest in the study by completing a brief online registration form  
273 (taking approximately 10-15 minutes to complete) obtaining their contact information, their  
274 child/children's demographic information, diagnostic statuses, previous evaluations on the Wechsler  
275 Intelligence Scale for Children-IV Chinese version (WISC-IV) [54], the Autism Diagnostic  
276 Observation Schedule-Generic (ADOS-G) [55], and screening for problem behaviours which may  
277 impact on their ability to engage positively in a group setting using the Childhood Behavior  
278 Checklist-parent version (CBCL) [56]. Obtaining parents' expression of interest in this way enables  
279 estimation of the demand for KONTAKT<sup>™</sup> from families engaging with CDBC.

280 Following the submission of their expression of interest, a research coordinator will assess  
281 candidates' eligibility to participate in the study. Parents of children meeting the inclusion criteria  
282 for the study will subsequently participate in a 10-20 minute prescreening phone interview,  
283 discussing with the research team their child's school lives (e.g. how their child is getting along  
284 with their classmates and teachers), academic performances, and special needs, and addressing any  
285 study-related questions. This brief interview with parents will also ascertain potential participants'  
286 suitability to cope with the cognitive and verbal demands of KONTAKT<sup>™</sup>.

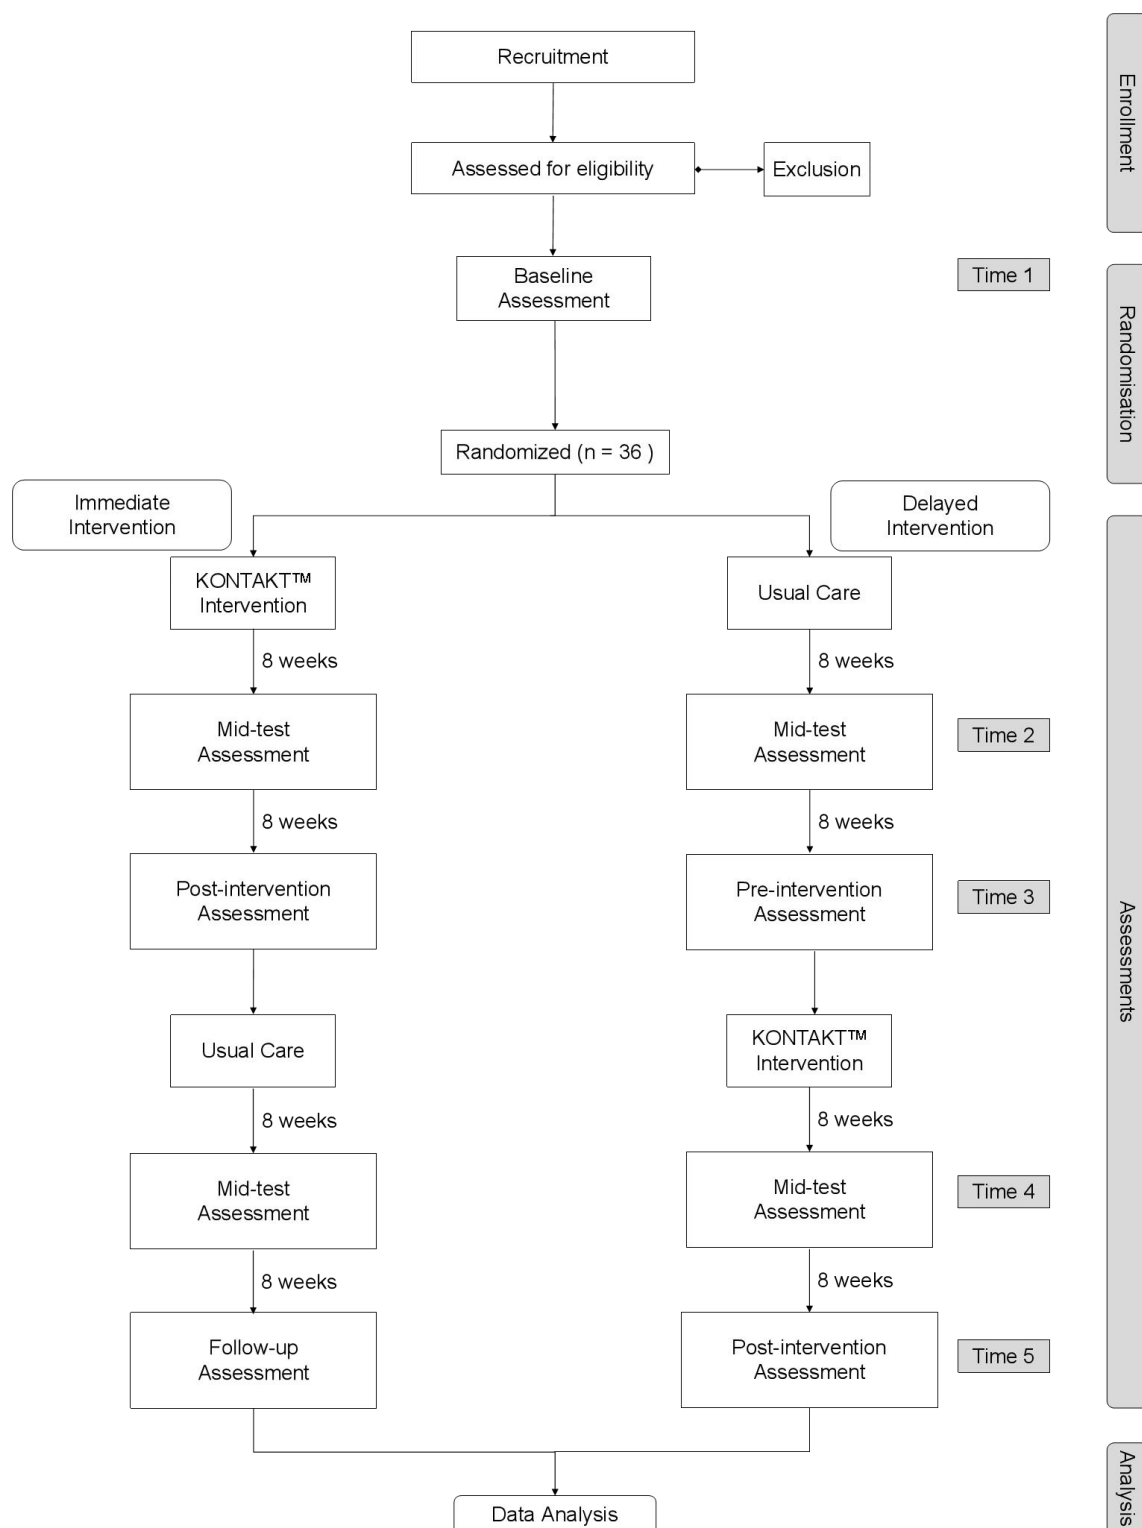

**Figure 1** Chinese KONTAKT™ CHILD feasibility study flowchart.

If fulfilling the prescreening criteria, candidate participants and their parents will attend CDBC

for a 50-minute face-to-face intake interview with the research coordinator. During the intake



interview, both children and parents will participate in a 20-minute individual interview with the research coordinator. Families meeting the inclusion criteria of the study will be provided with detailed oral and written information about their participation in the study, including the requirements. Written informed consent will be obtained from parents and children.

## **Eligibility criteria**

### *Inclusion criteria*

- (1) Aged 8-12 years;
- (2) A clinical diagnosis of autism (confirmed by ADOS-G, module 3);
- (3) A Full-scale IQ > 70 on the WISC-IV; and,
- (4) Resided in Guangzhou city for the past 12 months.

### *Exclusion criteria*

- (1) Significant physical impairment or severe metabolic disease(s);
- (2) Significant rule-breaking or aggressive behaviours within the last six months, as confirmed by CBCL;
- (3) Low intrinsic motivation to participate as confirmed by the intake interview;
- (4) Significant difficulties with Chinese characters reading comprehension or Mandarin expression and comprehension; and,
- (5) Prior or current behaviour or psychiatric conditions that could disrupt participation or necessitate other treatment(s).

Participants with common co-occurring neurodevelopmental or psychiatric conditions in

autistic individuals, such as attention-deficiency hyperactivity disorder, depression, anxiety, and tic disorder, are eligible if these conditions do not significantly interfere with participation. Participants will continue with their prescribed pharmacological treatments, psychological therapies, or other interventions while participating in KONTAKT™ CHILD. Written informed consent will be obtained from participants and parents after a thorough explanation of the study during the intake interview.

## **Intervention**

### *KONTAKT™ CHILD Intervention*

Prior to the development of this study protocol, a preliminary adaptation of KONTAKT™ (The first step of the ICAF - Information gathering) has been completed. The KONTAKT™ programme includes workbooks for trainers, children, and parents, supporting intervention fidelity. In adapting the 16-session variant of KONTAKT™ from the Australian English version to Mandarin Chinese, a rigorous process was employed. Firstly, an initial translation was made and verified for accuracy by bi-lingual authors (LU, ZH, and EW). Then, a working group of KONTAKT™ Chinese trainers, who are also CDBC clinicians, provided feedback on the initial programme materials. This step resulted in significant modifications to the discussion topics, particularly regarding those addressing autism diagnosis, making them more general and implicit (most notably in session 3). In addition, to encourage parents to discuss the autism diagnosis with their child, information relating to “how to talk about the diagnosis with your child”, was added to the first parent session. This adaptation was made given that research has highlighted that over 60% of Chinese autistic children are unaware of their autism diagnosis, with 40% of parents of Chinese autistic children preferring not to

331 disclose an autism diagnosis to their children [43].

332 The current adaptation of the KONTAKT™ programme also emphasises enhanced parent  
333 education and support. Parents will receive information and resources to support their children with  
334 the KONTAKT™ homework activities. This includes parents role-playing parent-child interactions  
335 during homework completion contexts and demonstration videos. Throughout the programme,  
336 KONTAKT™ trainers will also provide session-by-session feedback, interim and final report to  
337 parents on their child’s progress. Additionally, they will offer ongoing coaching and encouragement  
338 to parents. This enhanced parent support directly addresses a need identified in previous research  
339 [33] - Chinese parents expressed a desire for additional coaching skills education to facilitate their  
340 autistic children’s participation in SSGTs.

341 Moreover, members of the Chinese research team further modified and added questions, games,  
342 activities, and scenarios aligned with Chinese cultural norms. A Chinese name was also created for  
343 KONTAKT™, emphasizing the training’s focus on meaningful socialisation (交得益™). Finally, a  
344 family with an autistic adolescent proofread the manual and made edits to enhance language fluency  
345 and readability, and the inclusion of culturally appropriate terminology. Additionally, a logo for the  
346 Chinese version of KONTAKT™ was designed and utilised on customised stationary and course  
347 materials, to foster a sense of group cohesion among participants.

348 KONTAKT™ integrates Cognitive Behaviour Therapy principles and learning principles  
349 tailored towards the needs of autistic youth (see **Figure 2**) [26]. These include principles of  
350 psychoeducation, observational learning, modelling, behavioural activation, homework,  
351 computerised cognitive training, opportunities for rehearsal, a structured agenda, and parental

involvement. KONTAKT™ employs mandatory, recurring, and variable activities to support participants in achieving their personally meaningful social goals. Sessions aim to enhance understanding of social norms, develop adaptive socio-emotional skills, and promote practical applications. The first 11 sessions of KONTAKT™ consistently present weekly themes and assignments, while later sessions are led by the participants and tailored towards topics of interest to each group. In this way, KONTAKT™ accommodates not only for cultural context but also for the subtle differences and preferences of each KONTAKT™ group.

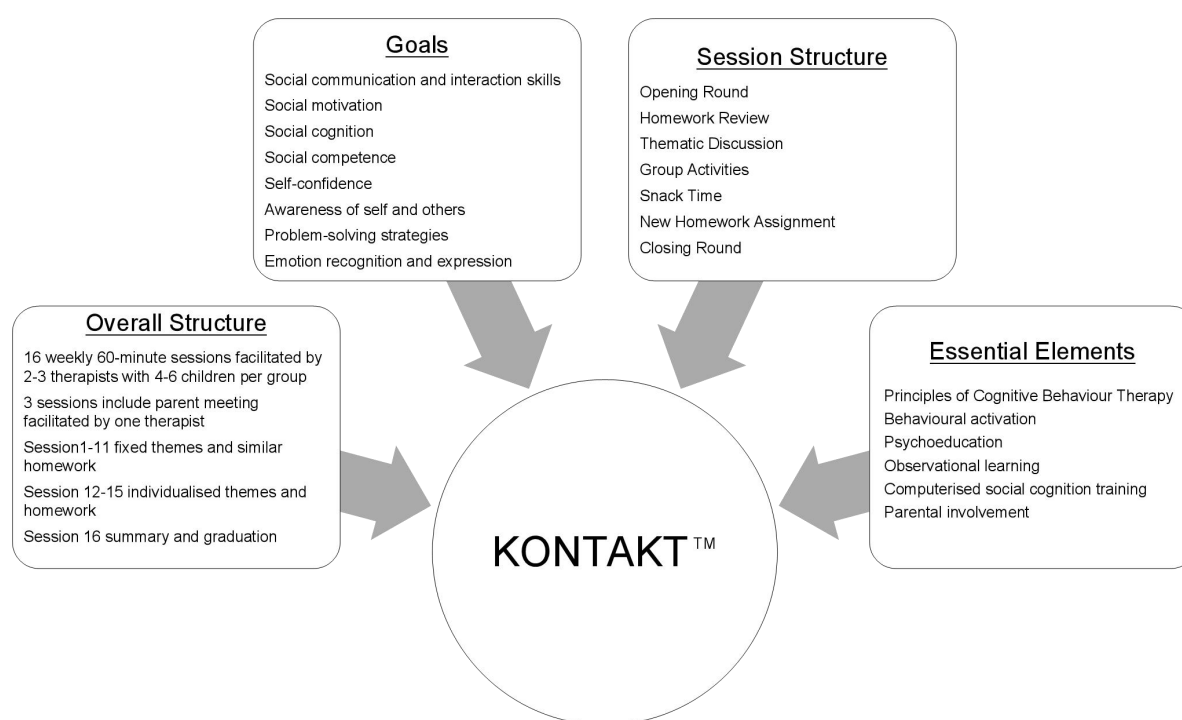

**Figure 2** Elements, structures, and goals of KONTAKT™ [7, 26].

A group of 4-6 participants will attend 16 consecutive sessions of KONTAKT™ led by 2 to 3 trainers on weekends, with each session lasting approximately 60 minutes. Three parent sessions will take place at the beginning, middle, and end of the training, offering parents individual feedback on their child's progress, presenting educational information on autism and approaches to discussing an autism diagnosis with their child, and encouraging parents in socially coaching their

366 children. During the parent sessions opportunities will be provided encouraging parents to ask  
367 questions, provide feedback, and engage with other parents of autistic children. Parents will be  
368 encouraged to assist their children with homework, with trainers providing feedback to parents after  
369 each session. Refer to **Supplementary Table 1 (online supplemental file 1)** for the structure and  
370 content of the Chinese KONTAKT™ CHILD version.

371 To ensure fidelity to the KONTAKT™ training protocol, trainers will complete  
372 session-by-session fidelity checklists and receive supervision from certified KONTAKT™ trainers.

### 373 **Description of the rationale for adopting the Chinese 16-session KONTAKT™**

374 While KONTAKT™ has been previously standardised and published in 12 and 24 session  
375 variants, the reasons underpinning the choice to tailor the 16-session variant to the Chinese  
376 Mainland were three-fold. Firstly, previous research found that the 12-session variant did not  
377 significantly outperform standard care in Sweden in children [28], and the 24-session variant had a  
378 higher attrition rate than the 16-session variant and 12-session variant (26% vs 11%/14%) [28, 29,  
379 30]. Moreover, aligning with the Chinese academic year structure, which consists of two terms with  
380 approximately five months each, the 16-session version is more practical. Lastly, evaluating the  
381 16-session variant will result in the DTG waiting for a 4 to 5 month period, which would be  
382 extended by evaluating the 24-session variant and negatively impact on adherence and the  
383 timeliness of access to the intervention [57].

### 384 **Explanation for the choice of comparators**

385 The waiting period of the DTG is limited to 4-5 months, roughly equivalent to one round of

386 KONTAKT™ training. While an active comparator in an RCT is typically the most robust, due to  
 387 limited clinical resources in the Chinese Mainland, a wait-list control group is considered more  
 388 practical. Moreover, given that “nonspecific” care is common in the Chinese Mainland, a wait-list  
 389 control group allows for assessing the additional impact of KONTAKT™ CHILD in addition to  
 390 standard care.

## 391 **Intervention adherence**

392 We will use a participant attendance sheet to track compliance, aiming for at least 80%  
 393 attendance (13 out of 16 sessions) as acceptable. Homework completion will also be recorded, with  
 394 a target of over 60% considered tolerable.

395 We will further adopt several approaches as recommended by Robiner to enhance the wait-list  
 396 group’s adherence [58]:

- 397 (1) Provide detailed study information to families during intake interviews;
- 398 (2) Emphasise to families the importance of adherence;
- 399 (3) Establish a collaborative working relationship with families during intake interviews to  
400 develop trust and rapport;
- 401 (4) Offer face-to-face assessments for regular clinical visits during the waiting periods;
- 402 (5) Limit the waiting time for the DTG to 4-5 months with a single-round intervention; and,
- 403 (6) Schedule appointments at times convenient to families, for example on weekends.

## 404 **Randomisation**

405 After the initial visit to the clinic, participants will be randomised to either ITG or DTG.

Randomisation will be conducted by a third party not involved in the Chinese KONTAKT™ CHILD trial using computer-generated sequentially random numbers. The permuted block numbers 4 to 6 will be used to restrict randomisation within the strata (birth-assigned sex). Each participant will be assigned a unique code.

#### Assessments/measures

Outcomes will be assessed from the perspective of multiple informants (children, parents, teachers, clinical ratings), via multiple data collection methods (questionnaires, interviews, observations, projective tests). The data collection timeline is presented in **Table 1**.

[Table 1]

All online questionnaire fields are mandatory, requiring completion to progress, eliminating the expectation of missing data. QR codes will be used for distributing the registration and teacher questionnaires, completed via the WeChat® app. All teacher questionnaires will be assigned a unique participant identification number.

*The primary outcome* of the KONTAKT™ CHILD study is improvement in social communication and interaction skills. This is assessed using the Contextual Assessment of Social Skills (CASS), an objective and ecologically valid observational measure [59]. The CASS involves two videotaped role-play assessments where participants engage in reciprocal conversation and interaction. These assessments take place in contexts that are manipulated to be either interesting or boring. This manipulation is achieved by changing how the confederate respond and interact with the participant. During each role-play, participants and an unknown adult confederate of an opposite

birth-assigned sex pretend that they have just joined a new club and are waiting for the first session to begin. During this three-minute waiting period, participants and the adult confederate can talk to each other. *Secondary outcomes* include autistic characteristics (Social Responsiveness Scale-2 [SRS-2] [60]), generalised social skills (Snack Time Assessment of Relationships and Social Skills [STARSS] [59, 61]), adaptive functioning (Adaptive Behaviour Assessment System-II [62, 63]), self-esteem and self-concept (Self-concept Scale Draw-A-Person [SCS-DAP] [64], Child Rosenberg Self-Esteem Scale [CRSES] [65]), cognitive development and psychosocial well-being (Koppitz Draw-A-Person Test [66, 67], Child Outcome Rating Scale [68, 69]), perceived school support school level [33], and parental reflective functioning [70]. *Feasibility outcomes* include acceptability, appropriateness, and negative effects assessed via quantitative data (fidelity checklists, recruitment rates, attendance rates, homework completion rates, Group Session Rating Scale [71], Theoretical Framework of Acceptability Questionnaire [72], and Negative Effects Questionnaire [73]) and qualitative data from focus groups held post-intervention (ITG: post-training [T3] and follow-up [T5]; DTG: post-training [T5]). *Common process factors measurements* include alliance (Therapeutic Alliance Scales for Children [74, 75]) and readiness for change (Preparedness for Participating in KONTAKT™ Scale [76]). *Cost-effectiveness outcomes* include healthcare consumption and productivity loss (the tailored version of the Treatment Inventory of Costs in Patients with Psychiatric Disorders - Child Version [77, 78]) and health-related quality of life (Child Health Utility 9D [79], EQ-5D-Y [80]).

For details of these measures and relation to the focus areas of the feasibility study outlined by Bowen et al. [81], see **online supplemental file 2**.



## 447 **Retention**

448 Families will be requested to attend data collection appointments at a time convenient to them  
449 with reminders from research assistants. Paper-pencil questionnaires will be mailed to families  
450 unable to attend appointments in person, and provided with a pre-paid envelope to return these via  
451 post. The reasons for participant withdrawal, adverse events, and other unintended effects will be  
452 documented and reported, and drop-outs will not be replaced.

## 453 **Data management**

454 In the Chinese KONTAKT™ CHILD feasibility study, all paper data will be converted to  
455 electronic format. Trained research assistants will input the data within two weeks after each  
456 assessment. Both paper and electronic data will be stored in EpiData [82] with double-entry for data  
457 integrity. Checks for referenced range values, valid values, and regular data consistency will be  
458 applied. Non-numeric data, including open-ended questions and notes, will be entered as originally  
459 written.

460 Video and audio recordings will be labelled with unique identifiers, with details recorded in the  
461 EpiData repository. Paper documents will be securely stored in locked filing cabinets at CDBC.  
462 Electronic textual data will be password-protected. Video and audio files will have dual backups on  
463 encrypted hard disks. Only the principal investigator will have full data access.

464 Incremental data and recording files will be backed up daily.

## 465 **Sample size**

466 The primary outcome of this present study is the CASS. Previous SSGT studies applying the  
 467 CASS suggested a medium effect size (ES) of 0.42 [83]. Additionally, a rough average ES of 0.40,  
 468 as measured by the SRS-2, is derived from the three prior RCT studies evaluating KONTAKT™  
 469 [28, 29, 30], and informs the expected ES for the future Chinese KONTAKT™ CHILD main trial.  
 470 According to Whitehead et al. [84], a feasibility study with a sample size of 15 per treatment arm  
 471 allows for detecting a medium ES (0.3~0.7) with 90% power and two-sided 5% significance in the  
 472 main trial. Accounting for a 15% attrition rate from previous KONTAKT™ evaluation studies, we  
 473 require a sample size of  $n = 18$  per arm ( $N = 36$  in total).

## 474 **Statistical analysis**

### 475 *Statistical methods for primary and secondary outcomes*

476 The primary outcome for this study is social-communication skills improvement as measured  
 477 by the CASS, with the follow-up being the primary endpoint. The analysis will follow the  
 478 intent-to-treat (ITT) principles [85], and all data from every participant will be analysed. Missing  
 479 data will be handled based on established guidelines for each measure or CONSORT-SPI statement.  
 480 No interim analysis will occur.

481 Data will be checked for normality and variance heterogeneity. Baseline demographics will be  
 482 compared between ITG and DTG using t-tests or Wilcoxon rank test (continuous variables) and  
 483 chi-square tests (categorical variables) to verify group comparability. Random mixed effects  
 484 regression models, which have the advantage of handling missing data, will compare ITG and DTG

for primary and secondary analyses, considering time (baseline, endpoint, follow-up), group (ITG, DTG), age, gender, IQ, co-occurring conditions, process factors (PPKS, GSRS at baseline), and the interaction variable (time  $\times$  group). Participants' ID will be regarded as a random effect accounting for intra-individual correlations. Intervention effects will be reported as least-square mean differences. ES will be reported by dividing the groups' mean difference (baseline to endpoint and baseline to follow-up) by the pooled standard deviations, with positive values favouring the intervention.

Feasibility measures will be reported descriptively. Additionally, qualitative data will be transcribed verbatim, de-identified, and then imported into NVivo 12 for theme-based analysis.

#### *Health economic analyses analysis*

Cost-effectiveness analysis (CEA) will follow an ITT basis, considering societal and healthcare perspectives. Cost differences will be statistically tested, while resource usage differences will not be compared to prevent false positives. Quality-adjusted life year (QALY) will be calculated from EQ-5D-Y and CHU9D scores using validated algorithms for Chinese children and adolescents [86, 87]. Given potential non-normality in cost data, a non-parametric random forest permutation model will handle missing data. The incremental cost-effectiveness ratio (ICER) will be calculated as  $\Delta\text{cost}/\Delta\text{QALYs}$ . Cost differences between ITG and DTG at different time points will be analysed via linear regression with bootstrapping for 5,000 repetitions to generate non-parametric confidence intervals (See **online supplemental file 3** for CEA details).

## 504 **Community and public involvement**

505       The first author, LU, is self-identified as autistic. During the adaptation stage, the training  
506 manual for KONTAKT™ was proofread by a family with an autistic adolescent. To assess training  
507 burden and programme acceptability, participants will provide feedback through a combination of  
508 questionnaires and focus group interviews (mixed methods). Advocating for outcomes focused on  
509 well-being and mental health, autistic people continue to emphasise the importance of listening to  
510 their voices. Thus, this trial will also capture both quantitative and qualitative data examining  
511 participants' experiences of receiving KONTAKT™ CHILD and the impact of the programme on  
512 children's well-being. We will further engage the autism community, involving both parents with  
513 autistic children and clinicians, in recruiting potential participants. Finally, participants will be  
514 invited to share their lived experiences of participating in KONTAKT™ with the autism community  
515 through community events and social media in China when the trial has ended.

## 516 **Discussion**

517       The study commenced recruitment on 2023 June 5. This article presents the design of the  
518 Chinese KONTAKT™ CHILD trial, a feasibility wait-list RCT featuring the Chinese 16-session  
519 KONTAKT™ variant for autistic children. This design incorporates multiple data sources and  
520 diverse outcome assessment methods, facilitating a comprehensive exploration of the feasibility of  
521 this programme from different perspectives. Furthermore, a systematic cultural adaptation process  
522 ensures the suitability, acceptability, and comprehensiveness of the Chinese KONTAKT™ version.  
523 Adhering to the ICAF framework, this study will guide the refinement of the Chinese KONTAKT™

version and future larger-scale evaluations, addressing the question of whether SSGT can be effectively implemented for Chinese school-aged autistic children.

While there are several strengths in the study design mentioned earlier, it's important to acknowledge some limitations. Firstly, conducted in Guangzhou, one of China's most advanced cities, the study's single-site nature may limit the generalisability of the findings to other clinical settings in the Chinese Mainland, especially to regions with more limited resources. Additionally, certain measures planned for use in the study, such as the CRSES and the SCS-DAP, may have uncertain psychometric properties due to the lack of Chinese population data. However, this feasibility study aims to provide empirical data on the psychometrics of these measures with Chinese autistic children. Another limitation is the absence of an active comparator, as the wait-list control could potentially overestimate treatment effects [88]. Nevertheless, this aligns with the prevailing situation in China. Furthermore, the study will collect data on parents' and children's readiness for change, allowing for an exploration of the "help-seeker" effects, following the recommendation by Cunningham and colleagues in 2013 [88]. Lastly, it should be noted that the sample size justification in the current protocol did not consider the influences of covariates on decreasing the power of the analysis.

As mentioned above, the final stage of the ICAF involves running a full-scale RCT trial to evaluate the efficacy of the Chinese version of KONTAKT™. Therefore, upon completing this feasibility study, the investigators will integrate all quantitative and qualitative results to decide whether a full-scale RCT trial will progress or redesigning another KONTAKT™ feasibility study will be needed. The following aspects will be considered: (1) participants' and parents' acceptability

545 and adherence rates, (2) participants' and parents' feedback on demand and training burden for  
 546 KONTAKT™, (3) trainers' feedback on implementing KONTAKT™ in Chinese clinical setting, (4)  
 547 trainers' fidelity on implementing KONTAKT™, (5) the feasibility results of the processes for data  
 548 collecting, and (6) considering the potential capacity of the intervention setting (human resources,  
 549 materials, and equipment) on implementing a full-scale RCT regarding the sample size calculation  
 550 for the primary outcome.

## 551 **Plans for dissemination of finding**

552 The findings of the Chinese KONTAKT™ CHILD trial will be submitted to peer-reviewed  
 553 journals for consideration. Abstracts will also be submitted to both local and international  
 554 conferences, and community-based lay abstracts will be written and disseminated to provide  
 555 feedback to autism stakeholders in China.

## References

1. American Psychiatric Association. Diagnostic and statistical manual of mental disorders. 5th ed., text rev.;2022.
2. Tillmann J, San Jose Caceres A, Chatham CH, et al. Investigating the factors underlying adaptive functioning in autism in the EU-AIMS Longitudinal European Autism Project. *Autism Res* 2019;12(4):645-57. <https://doi.org/10.1002/aur.2081>. Epub 2019 Feb 12.
3. Zhou H, Xu X, Yan W, et al. Prevalence of Autism Spectrum Disorder in China: A Nationwide Multi-center Population-based Study Among Children Aged 6 to 12 Years. *Neurosci Bull* 2020;36(9):961-71. <https://doi.org/10.1007/s12264-020-00530-6>. Epub 2020 Jul 02.
4. Gilmore R, Ziviani J, Chatfield MD, et al. Social skills group training in adolescents with disabilities: A systematic review. *Res Dev Disabil* 2022;125:104218. <https://doi.org/10.1016/j.ridd.2022.104218>. Epub 2022 Mar 21.
5. Kaat AJ, Lecavalier L. Group-based social skills treatment: A methodological review. *Res Autism Spectr Disord* 2014;8(1):15-24. <https://doi.org/10.1016/j.rasd.2013.10.007>.
6. Afsharnejad B, Black MH, Falkmer M, et al. The Methodological Quality and Intervention Fidelity of Randomised Controlled Trials Evaluating Social Skills Group Programs in Autistic Adolescents: A Systematic Review and Meta-analysis. *J Autism Dev Disord* 2023 <https://doi.org/10.1007/s10803-023-05893-z>. Epub 2023 Jan 22.

7. Girdler S, Afsharnejad B, Black MH, et al. KONTAKT® Manual English version. Australia2021.
8. Gates JA, Kang E, Lerner MD. Efficacy of group social skills interventions for youth with autism spectrum disorder: A systematic review and meta-analysis. Clin Psychol Rev 2017;52:164-81. <https://doi.org/10.1016/j.cpr.2017.01.006>. Epub 2017 Jan 29.
9. Wolstencroft J, Robinson L, Srinivasan R, et al. A Systematic Review of Group Social Skills Interventions, and Meta-analysis of Outcomes, for Children with High Functioning ASD. J Autism Dev Disord 2018;48(7):2293-307. <https://doi.org/10.1007/s10803-018-3485-1>. Epub 2018 Feb 10.
10. Zheng S, Kim H, Salzman E, et al. Improving Social Knowledge and Skills among Adolescents with Autism: Systematic Review and Meta-Analysis of UCLA PEERS(R) for Adolescents. J Autism Dev Disord 2021;51(12):4488-503. <https://doi.org/10.1007/s10803-021-04885-1>. Epub 2021 Jan 30.
11. Miller A, Vernon T, Wu V, et al. Social Skill Group Interventions for Adolescents with Autism Spectrum Disorders: a Systematic Review. Rev J Autism Dev Disord 2014;1(4):254-65. <https://doi.org/10.1007/s40489-014-0017-6>.
12. Soares EE, Bausback K, Beard CL, et al. Social Skills Training for Autism Spectrum Disorder: a Meta-analysis of In-person and Technological Interventions. J Technol Behav Sci 2021;6(1):166-80. <https://doi.org/10.1007/s41347-020-00177-0>. Epub 2020 Nov 24.
13. Bottema-Beutel K, Park H, Kim SY. Commentary on Social Skills Training



Curricula for Individuals with ASD: Social Interaction, Authenticity, and Stigma. J Autism Dev Disord 2018;48(3):953-64. <https://doi.org/10.1007/s10803-017-3400-1>. Epub 2017 Nov 25.

14. Kinnaird E, Stewart C, Tchaturia K. Investigating alexithymia in autism: A systematic review and meta-analysis. Eur Psychiatry 2019;55:80-89. <https://doi.org/10.1016/j.eurpsy.2018.09.004>. Epub 2018 Nov 07.

15. Pellicano E, Heyworth M. The Foundations of Autistic Flourishing. Curr Psychiatry Rep 2023;25(9):419-27. <https://doi.org/10.1007/s11920-023-01441-9>. Epub 2023 Aug 08.

16. Nicolaidis C, Raymaker D, Kapp SK, et al. The AASPIRE practice-based guidelines for the inclusion of autistic adults in research as co-researchers and study participants. Autism 2019;23(8):2007-19. <https://doi.org/10.1177/1362361319830523>. Epub 2019 Apr 04.

17. Tavernor L, Barron E, Rodgers J, et al. Finding out what matters: validity of quality of life measurement in young people with ASD. Child Care Health Dev 2013;39(4):592-601. <https://doi.org/10.1111/j.1365-2214.2012.01377.x>. Epub 2012 Apr 21.

18. Huggins CF, Donnan G, Cameron IM, et al. Emotional self-awareness in autism: A meta-analysis of group differences and developmental effects. Autism 2021;25(2):307-21. <https://doi.org/10.1177/1362361320964306>. Epub 2020 Nov 07.

19. Tang JSY, Falkmer M, Chen NTM, et al. Designing a Serious Game for Youth with ASD: Perspectives from End-Users and Professionals. J Autism Dev Disord 2019;49(3):978-95. <https://doi.org/10.1007/s10803-018-3801-9>. Epub 2018 Nov 01.

20. Lee A, Peter Hobson R. Drawing self and others: How do children with autism differ from those with learning difficulties? *Br J Dev Psychol* 2006;24(3):547-65. <https://doi.org/10.1348/026151005X49881>.

21. Papangelo P, Pinzino M, Pelagatti S, et al. Human Figure Drawings in Children with Autism Spectrum Disorders: A Possible Window on the Inner or the Outer World. *Brain Sci* 2020;10(6) <https://doi.org/10.3390/brainsci10060398>. Epub 2020 Jun 27.

22. Kotroni P, Bonoti F, Mavropoulou S. Children with autism can express social emotions in their drawings. *Int J Dev Disabil* 2018;65(4):248-56. <https://doi.org/10.1080/20473869.2018.1434855>. Epub 2018 Feb 13.

23. Schweizer C, Knorth EJ, Spreen M. Art therapy with children with Autism Spectrum Disorders: A review of clinical case descriptions on ‘what works’. *The Arts in Psychotherapy* 2014;41(5):577-93. <https://doi.org/10.1016/j.aip.2014.10.009>.

24. Waller D. Art therapy for children: how it leads to change. *Clin Child Psychol Psychiatry* 2006;11(2):271-82. <https://doi.org/10.1177/1359104506061419>. Epub 2006 Nov 08.

25. Albaum CS, Vashi N, Bohr Y, et al. A Systematic Review of Therapeutic Process Factors in Mental Health Treatment for Autistic Youth. *Clin Child Fam Psychol Rev* 2023;26(1):212-41. <https://doi.org/10.1007/s10567-022-00409-0>. Epub 2022 Aug 24.

26. Bölte S. Social färdtGhetsträning i grupp med fokus på kommunikation och social interaktion vid autismspektrumtillstånd enligt Frankfurtmodellen (KONTAKT). Göttingen, Stockholm: Hogrefe; 2018.

27. Herbrecht E, Poustka F, Birnkammer S, et al. Pilot evaluation of the Frankfurt Social Skills Training for children and adolescents with autism spectrum disorder. *Eur Child Adolesc Psychiatry* 2009;18(6):327-35. <https://doi.org/10.1007/s00787-008-0734-4>. Epub 2009 Jan 24.

28. Choque Olsson N, Flygare O, Coco C, et al. Social Skills Training for Children and Adolescents With Autism Spectrum Disorder: A Randomized Controlled Trial. *J Am Acad Child Adolesc Psychiatry* 2017;56(7):585-92. <https://doi.org/10.1016/j.jaac.2017.05.001>. Epub 2017 Jun 26.

29. Jonsson U, Olsson NC, Coco C, et al. Long-term social skills group training for children and adolescents with autism spectrum disorder: a randomized controlled trial. *Eur Child Adolesc Psychiatry* 2019;28(2):189-201. <https://doi.org/10.1007/s00787-018-1161-9>. Epub 2018 May 12.

30. Afsharnejad B, Falkmer M, Black MH, et al. KONTAKT(R) social skills group training for Australian adolescents with autism spectrum disorder: a randomized controlled trial. *Eur Child Adolesc Psychiatry* 2022;31(11):1695-713. <https://doi.org/10.1007/s00787-021-01814-6>. Epub 2021 May 31.

31. Afsharnejad B, Falkmer M, Picen T, et al. "I Met Someone Like Me!": Autistic Adolescents and Their Parents' Experience of the KONTAKT(R) Social Skills Group Training. *J Autism Dev Disord* 2022;52(4):1458-77. <https://doi.org/10.1007/s10803-021-05045-1>. Epub 2021 May 05.

32. Choque Olsson N, Rautio D, Asztalos J, et al. Social skills group training in

high-functioning autism: A qualitative responder study. *Autism* 2016;20(8):995-1010.

<https://doi.org/10.1177/1362361315621885>. Epub 2016 Feb 26.

33. Lao U, Li Y, Bai W, et al. Adaptation and Feasibility of the Mandarin Version of PEERS((R)) for Autistic Adolescents. *J Autism Dev Disord* 2023.

<https://doi.org/10.1007/s10803-023-06056-w>. Epub 2023 Jul 22.

34. Hodge DR, Jackson KF, Vaughn MG. Culturally sensitive interventions and health and behavioral health youth outcomes: a meta-analytic review. *Soc Work Health Care* 2010;49(5):401-23. <https://doi.org/10.1080/00981381003648398>. Epub 2010 Jun 04.

35. Barrera M, Jr., Castro FG, Strycker LA, et al. Cultural adaptations of behavioral health interventions: a progress report. *J Consult Clin Psychol* 2013;81(2):196-205. <https://doi.org/10.1037/a0027085>. Epub 2012 Feb 01.

36. Bernal G, Bonilla J, Bellido C. Ecological validity and cultural sensitivity for outcome research: issues for the cultural adaptation and development of psychosocial treatments with Hispanics. *J Abnorm Child Psychol* 1995;23(1):67-82. <https://doi.org/10.1007/BF01447045>. Epub 1995 Feb 01.

37. Faregh N, Lencucha R, Ventevogel P, et al. Considering culture, context and community in mhGAP implementation and training: challenges and recommendations from the field. *Int J Ment Health Syst* 2019;13:58. <https://doi.org/10.1186/s13033-019-0312-9>. Epub 2019 Aug 30.

38. Bölte S, Lawson WB, Marschik PB, et al. Reconciling the seemingly irreconcilable: The WHO's ICF system integrates biological and psychosocial environmental determinants

of autism and ADHD: The International Classification of Functioning (ICF) allows to model opposed biomedical and neurodiverse views of autism and ADHD within one framework. Bioessays 2021;43(9):e2000254. <https://doi.org/10.1002/bies.202000254>. Epub 2021 Apr 03.

39. Bishop-Fitzpatrick L, Kind AJH. A Scoping Review of Health Disparities in Autism Spectrum Disorder. J Autism Dev Disord 2017;47(11):3380-91. <https://doi.org/10.1007/s10803-017-3251-9>. Epub 2017 Aug 02.

40. Kang-Yi CD, Grinker RR, Beidas R, et al. Influence of Community-Level Cultural Beliefs about Autism on Families' and Professionals' Care for Children. Transcult Psychiatry 2018;55(5):623-47. <https://doi.org/10.1177/1363461518779831>. Epub 2018 Jul 05.

41. Ravindran N, Myers BJ. Cultural Influences on Perceptions of Health, Illness, and Disability: A Review and Focus on Autism. J Child Fam Stud 2012;21(2):311-19. <https://doi.org/10.1007/s10826-011-9477-9>.

42. Clark E, Zhou Z, Du L. Autism in China: Progress and challenges in addressing the needs of children and families. Int J Sch Educ Psychol 2019;7(2):135-46. <https://doi.org/10.1080/21683603.2019.1570885>.

43. Lao UC, Liang FJ, Dai JM, et al. Familiarity vs. Favorability: Exploring Formal Autism Terminology in Chinese Discourse. 2023 <https://doi.org/https://doi.org/10.31219/osf.io/cp73f>. Epub 2023 Oct 10.

44. Sun X, Allison C, Auyeung B, et al. Service provision for autism in mainland China: preliminary mapping of service pathways. Soc Sci Med 2013;98:87-94.

<https://doi.org/10.1016/j.socscimed.2013.08.016>. Epub 2013 Dec 18.

45. Wang F, Lao UC, Xing YP, et al. Parents' knowledge and attitude and behavior toward autism: a survey of Chinese families having children with autism spectrum disorder. Transl Pediatr 2022;11(9):1445-57. <https://doi.org/10.21037/tp-22-113>. Epub 2022 Oct 18.

46. Zhao Y, Luo Y, Zhang R, et al. Direct and indirect costs for families of children with autism spectrum disorder in China. Autism 2023;27(8):2337-47. <https://doi.org/10.1177/13623613231158862>. Epub 2023 Mar 08.

47. Aarons GA, Green AE, Palinkas LA, et al. Dynamic adaptation process to implement an evidence-based child maltreatment intervention. Implement Sci 2012;7:32. <https://doi.org/10.1186/1748-5908-7-32>. Epub 2012 Apr 20.

48. Highfield L, Hartman MA, Mullen PD, et al. Intervention Mapping to Adapt Evidence-Based Interventions for Use in Practice: Increasing Mammography among African American Women. Biomed Res Int 2015;2015:160103. <https://doi.org/10.1155/2015/160103>. Epub 2015 Nov 21.

49. Thabane L, Lancaster G. A guide to the reporting of protocols of pilot and feasibility trials. Pilot Feasibility Stud 2019;5:37. <https://doi.org/10.1186/s40814-019-0423-8>. Epub 2019 Mar 13.

50. Chan AW, Tetzlaff JM, Altman DG, et al. SPIRIT 2013 statement: defining standard protocol items for clinical trials. Ann Intern Med 2013;158(3):200-7. <https://doi.org/10.7326/0003-4819-158-3-201302050-00583>. Epub 2013 Jan 09.

51. Grant S, Mayo-Wilson E, Montgomery P, et al. CONSORT-SPI 2018 Explanation

and Elaboration: guidance for reporting social and psychological intervention trials. *Trials* 2018;19(1):406. <https://doi.org/10.1186/s13063-018-2735-z>. Epub 2018 Aug 01.

52. Bouwmans C, Schawo S, Hakkaart-van Roijen L. *TiC-P kinderen Handleiding*. Netherlands: Institute for Medical Technology Assessment, Erasmus University Rotterdam; 2012.

53. Tencent. WeChat Mini Programs 2024. Available from: <https://mp.weixin.qq.com/cgi-bin/wx>, accessed 2024 June 08.

54. Zhang H. The revision of WISC-IV Chinese version. *Psychological Science* 2009;32(5):1177-79.

55. Lord C, Rutter M, Le Couteur A. Autism Diagnostic Interview-Revised: a revised version of a diagnostic interview for caregivers of individuals with possible pervasive developmental disorders. *J Autism Dev Disord* 1994;24(5):659-85. <https://doi.org/10.1007/BF02172145>. Epub 1994 Oct 01.

56. Su L, Li X, Wan G, et al. The norms of Achenbach Child Behavior Checklist in Hunan province. *Chin J Clin Psychol* 1996;4(1):24-28.

57. Thornton CS, Tsai WH, Santana MJ, et al. Effects of Wait Times on Treatment Adherence and Clinical Outcomes in Patients With Severe Sleep-Disordered Breathing: A Secondary Analysis of a Noninferiority Randomized Clinical Trial. *JAMA Netw Open* 2020;3(4):e203088. <https://doi.org/10.1001/jamanetworkopen.2020.3088>. Epub 2020 Apr 21.

58. Robiner WN. Enhancing adherence in clinical research. *Contemp Clin Trials*

2005;26(1):59-77. <https://doi.org/10.1016/j.cct.2004.11.015>.

59. Ratto AB, Turner-Brown L, Rupp BM, et al. Development of the Contextual Assessment of Social Skills (CASS): a role play measure of social skill for individuals with high-functioning autism. J Autism Dev Disord 2011;41(9):1277-86. <https://doi.org/10.1007/s10803-010-1147-z>. Epub 2011 Feb 03.

60. Constantino JN, Gruber CP. Social responsiveness scale: SRS-2: Western psychological services Torrance, CA; 2012.

61. Bent S, McDonald MG, Chen Y, et al. Brief report: Game day: A novel method of assessing change in social competence in students with autism spectrum disorder (ASD). Research in Autism Spectrum Disorders 2021;84 <https://doi.org/10.1016/j.rasd.2021.101766>.

62. Li YQ, Qiu ZY. Standardization of Adaptive Behavior Assessment System-II (6-18 Years Old) Chinese Version. Chin J Rehabil Theory Practice 2016;378-82.

63. Oakland T, Harrison PL. Adaptive behavior assessment system-II: Clinical use and interpretation: Academic Press; 2011.

64. Bodwin RF, Bruck M. The adaptation and validation of the Draw-A-Person Test as a measure of self concept. J Clin Psychol 1960.

65. Wood C, Griffin M, Barton J, et al. Modification of the Rosenberg scale to assess self-esteem in children. Front Public Health 2021;9:655892. <https://doi.org/10.3389/fpubh.2021.655892>.

66. Koppitz E. El dibujo de la figura humana. Buenos Aires: Guadalupe 2000.



67. Koppitz EM. Psychological Evaluation of Children's Human Figure Drawings: Grune & Stratton; 1968.

68. Casey P, Patalay P, Deighton J, et al. The Child Outcome Rating Scale: validating a four-item measure of psychosocial functioning in community and clinic samples of children aged 10-15. Eur Child Adolesc Psychiatry 2020;29(8):1089-102. <https://doi.org/10.1007/s00787-019-01423-4>. Epub 2019 Oct 30.

69. Sparks JA, Miller SD, Bohanske RT, et al. Giving youth a voice: A preliminary study of the reliability and validity of a brief outcome measure for children, adolescents, and caretakers. J Brief Ther 2006;5(2):71-88.

70. Ye P, Ju J, Zheng K, et al. Psychometric Evaluation of the Parental Reflective Functioning Questionnaire in Chinese Parents. Front Psychol 2022;13:745184. <https://doi.org/10.3389/fpsyg.2022.745184>. Epub 2022 Feb 15.

71. Duncan B, Miller S, Sparks J, et al. The child group session rating scale. Jensen Beach, FL, USA 2011.

72. Sekhon M, Cartwright M, Francis JJ. Development of a theory-informed questionnaire to assess the acceptability of healthcare interventions. BMC Health Serv Res 2022;22(1):279. <https://doi.org/10.1186/s12913-022-07577-3>. Epub 2022 Mar 03.

73. Rozental A, Kottorp A, Forsstrom D, et al. The Negative Effects Questionnaire: psychometric properties of an instrument for assessing negative effects in psychological treatments. Behav Cogn Psychother 2019;47(5):559-72. <https://doi.org/10.1017/S1352465819000018>. Epub 2019 Mar 16.

74. Accurso EC, Hawley KM, Garland AF. Psychometric properties of the Therapeutic Alliance Scale for Caregivers and Parents. Psychol Assess 2013;25(1):244-52. <https://doi.org/10.1037/a0030551>. Epub 2012 Oct 24.
75. Shirk SR, Saiz CC. Clinical, empirical, and developmental perspectives on the therapeutic relationship in child psychotherapy. Dev Psychopathol 1992;4(4):713-28.
76. Albaum C, Tablon P, Roudbarani F, et al. Predictors and outcomes associated with therapeutic alliance in cognitive behaviour therapy for children with autism. Autism 2020;24(1):211-20. <https://doi.org/10.1177/1362361319849985>. Epub 2019 Jun 20.
77. Afsharnejad B, Falkmer M, Black MH, et al. KONTAKT(c) for Australian adolescents on the autism spectrum: protocol of a randomized control trial. Trials 2019;20(1):687. <https://doi.org/10.1186/s13063-019-3721-9>. Epub 2019 Dec 10.
78. Bouwmans C, De Jong K, Timman R, et al. Feasibility, reliability and validity of a questionnaire on healthcare consumption and productivity loss in patients with a psychiatric disorder (TiC-P). BMC Health Serv Res 2013;13:217. <https://doi.org/10.1186/1472-6963-13-217>. Epub 2013 Jun 19.
79. Chen G, Xu F, Huynh E, et al. Scoring the Child Health Utility 9D instrument: estimation of a Chinese child and adolescent-specific tariff. Qual Life Res 2019;28(1):163-76. <https://doi.org/10.1007/s11136-018-2032-z>. Epub 2018 Oct 31.
80. Wille N, Badia X, Bonsel G, et al. Development of the EQ-5D-Y: a child-friendly version of the EQ-5D. Qual Life Res 2010;19(6):875-86. <https://doi.org/10.1007/s11136-010-9648-y>. Epub 2010 Apr 21.

81. Bowen DJ, Kreuter M, Spring B, et al. How we design feasibility studies. Am J Prev Med 2009;36(5):452-7. <https://doi.org/10.1016/j.amepre.2009.02.002>. Epub 2009 Apr 14.

82. Lauritsen J, Bruus M. EPIDATA: Data entry system for use with Stata, SPSS, SAS, Excel, text formats. 2000.

83. Rabin SJ, Laugeson EA, Mor-Snir I, et al. An Israeli RCT of PEERS(R): Intervention Effectiveness and the Predictive Value of Parental Sensitivity. J Clin Child Adolesc Psychol 2021;50(6):933-49. <https://doi.org/10.1080/15374416.2020.1796681>. Epub 2020 Aug 12.

84. Whitehead AL, Julious SA, Cooper CL, et al. Estimating the sample size for a pilot randomised trial to minimise the overall trial sample size for the external pilot and main trial for a continuous outcome variable. Stat Methods Med Res 2016;25(3):1057-73. <https://doi.org/10.1177/0962280215588241>. Epub 2015 Jun 21.

85. McCoy CE. Understanding the Intention-to-treat Principle in Randomized Controlled Trials. West J Emerg Med 2017;18(6):1075-78. <https://doi.org/10.5811/westjem.2017.8.35985>. Epub 2017 Nov 01.

86. Yang P, Chen G, Wang P, et al. Psychometric evaluation of the Chinese version of the Child Health Utility 9D (CHU9D-CHN): a school-based study in China. Qual Life Res 2018;27(7):1921-31. <https://doi.org/10.1007/s11136-018-1864-x>. Epub 2018 May 08.

87. Yang Z, Jiang J, Wang P, et al. Estimating an EQ-5D-Y-3L Value Set for China. Pharmacoeconomics 2022;40(Suppl 2):147-55. <https://doi.org/10.1007/s40273-022-01216-9>.

828 Epub 2022 Nov 18.

829 88. Cunningham JA, Kypri K, McCambridge J. Exploratory randomized controlled  
830 trial evaluating the impact of a waiting list control design. BMC Med Res Methodol  
831 2013;13:150. <https://doi.org/10.1186/1471-2288-13-150>. Epub 2013 Dec 10.

832

## 833 **Footnotes**

### 834 **Authors' contributions**

835 LU, ZH, ZX, SB, and SG undertook the conceptualisation and design of the study. LU, ZH,  
836 EW translated the manuals and workbooks. LU, ZH, SB, SG, and ZX selected the measures used.  
837 EW, FJ, YP, HX, ZH, LU, and ZX improved the content of the manual. FJ, YP, ZH, and ZX assist  
838 with administration of groups and offer clinical support. LU drafted the manuscript, with inputs  
839 from ZH, SB, SG, and ZX. All authors contributed to, read and approved the final manuscript.

### 840 **Funding statement**

841 This research now receives fundings from Guangdong Science and Technology Program  
842 (2023A1111120012) and Guangzhou Science and Technology Program (2024B03J0529).

### 843 **Competing interests**

844 Part of this protocol was presented as a poster at the International Society of Autism Research  
845 Annual Meeting, 2024 May 16. ZX received funding from the Guangdong Science and Technology  
846 Department, and ZH received funding from the Guangzhou Municipal Science and Technology  
847 Bureau. The funding organisations do not influence the study design, data  
848 collection/analysis/interpretation, manuscript review/approval, or publication decision. All other  
849 authors declare that they have no conflicts of interest.

## 850 **Ethics approval**

851 This study has been approved by the Ethical Board Committee at the Third Affiliated Hospital  
852 of Sun Yat-sen University (II2023-119-01), and pre-registered in Chinese Clinical Trials  
853 (ChiCTR2300072136).

## 854 **Availability of data and materials**

855 The ethical consent and funding documents have been reviewed by the review board of the  
856 Chinese Clinical Trial Registry and are available for review by the Editorial Office. Anonymised  
857 data related to this study will be available from the corresponding author upon reasonable request  
858 after study completion and publication of the study. The final dataset generated during this study  
859 will upload to the Research Data Deposit of Sun Yat-sen University. Trial results will be reported  
860 and published in scientific journals.

## 861 **Acknowledgments**

862 We acknowledge the generous support from the Swedish team at Karolinska  
863 Institutet/Stockholm Health Services and the Australian team at Curtin University. They facilitated  
864 the training, provided precious experiences and materials for the CDBC KONTAKT™ trainers . We  
865 thanks the CDBC KONTAKT™ team for facilitating the process of this trial. We sincerely thank  
866 the autistic individual, Yihan Liu, and her families for validating the translation and contents of the  
867 Chinese KONTKAT™ manual. Additionally, we appreciate Yan Li for designing the tools for the  
868 KONTAKT™ CHILD programmes.

870 **Tables**

871 **Table 1.** Schedule of enrolment, interventions, and data collection for the study

|                           | Involvement <sup>a</sup> |   |   |   |   | STUDY PERIOD |            |                 |    |    |    |    |
|---------------------------|--------------------------|---|---|---|---|--------------|------------|-----------------|----|----|----|----|
|                           |                          |   |   |   |   | Enrolment    | Allocation | Post-allocation |    |    |    |    |
|                           | C                        | P | T | E | F |              |            |                 |    |    |    |    |
| TIME POINTS <sup>b</sup>  |                          |   |   |   |   | -T1          | 0          | T1              | T2 | T3 | T4 | T5 |
| ENROLMENT:                |                          |   |   |   |   |              |            |                 |    |    |    |    |
| Eligibility Screen        |                          |   |   | X |   | X            |            |                 |    |    |    |    |
| Informed consent          |                          |   |   | X |   | X            |            |                 |    |    |    |    |
| Allocation                |                          |   |   |   |   |              | X          |                 |    |    |    |    |
| INTERVENTIONS             |                          |   |   |   |   |              |            |                 |    |    |    |    |
| (KONTAKT <sup>TM</sup> ): |                          |   |   |   |   |              |            |                 |    |    |    |    |
| Immediate Intervention    | X                        | X | X | X | X |              |            | ←→              |    |    |    | X  |
| Delay Intervention        | X                        | X | X | X | X |              |            | X               |    | ←→ |    |    |
| DATA COLLECTION           |                          |   |   |   |   |              |            |                 |    |    |    |    |
| ASSESSMENTS:              |                          |   |   |   |   |              |            |                 |    |    |    |    |
| CBCL                      |                          | X |   |   |   | X            |            |                 |    |    |    |    |
| Screening WISC-IV         | X                        |   |   | X |   | X            |            |                 |    |    |    |    |
| ADOS-G                    | X                        |   |   | X |   | X            |            |                 |    |    |    |    |

|                           |             |   |   |   |   |   |   |  |   |   |   |   |
|---------------------------|-------------|---|---|---|---|---|---|--|---|---|---|---|
|                           | STI         |   | X |   | X |   | X |  |   |   |   |   |
|                           | SFI         | X | X |   | X |   | X |  |   |   |   |   |
|                           | SES         |   | X |   |   |   | X |  |   |   |   |   |
| <b>Primary Outcomes</b>   | CASS (+CRS) | X |   |   | X |   |   |  | X |   | X | X |
|                           | SRS-2       |   | X | X |   |   |   |  | X |   | X | X |
|                           | CRSES       | X |   |   |   |   |   |  | X |   | X | X |
|                           | Koppitz     | X |   |   | X |   |   |  | X |   | X | X |
|                           | DAPT        |   |   |   |   |   |   |  |   |   |   |   |
| <b>Secondary Outcomes</b> | SCS-DAP     | X |   |   | X |   |   |  | X |   | X | X |
|                           | CORS        | X |   |   |   |   |   |  |   |   |   |   |
|                           | PRFQ        |   | X |   |   |   |   |  | X |   | X | X |
|                           | ABAS-2      |   | X | X |   |   |   |  | X |   | X | X |
|                           | PSS         |   | X |   |   |   |   |  | X |   | X | X |
|                           | STARSS      | X |   |   | X |   |   |  |   |   |   |   |
| <b>Process Factors</b>    | TPOCS       | X |   |   | X |   |   |  | X | X | X | X |
|                           | PPKS        | X | X |   |   |   | X |  |   |   |   |   |
|                           | TASC        | X | X |   |   | X |   |  | X | X | X | X |
| <b>Fidelity Outcomes</b>  | Attendance  | X | X |   |   | X |   |  |   |   |   |   |
|                           | HCR         | X |   |   |   | X |   |  |   |   |   |   |



|                                    |             |   |   |  |  |   |  |  |   |    |    |    |
|------------------------------------|-------------|---|---|--|--|---|--|--|---|----|----|----|
|                                    | Focus Group | X | X |  |  | X |  |  |   | X  |    | X  |
|                                    | KFC         |   |   |  |  | X |  |  |   | ←→ | ←→ | ←→ |
|                                    | GSRS        | X |   |  |  |   |  |  |   | ←→ | ←→ | ←→ |
|                                    | TFAQ        |   | X |  |  |   |  |  | X | X  | X  | X  |
|                                    | NEQ         |   | X |  |  |   |  |  |   |    | X  | X  |
| <b>Cost-effectiveness Outcomes</b> | TIC-PC      |   | X |  |  |   |  |  | X | X  | X  | X  |
|                                    | CHU9D       | X |   |  |  |   |  |  | X | X  | X  | X  |
|                                    | EQ-5D-Y     |   | X |  |  |   |  |  | X | X  | X  | X  |

a: Involvement: C: Child; P: Parent; T: Teacher; E: Evaluator blinded to the hypothesis; F: Trainer.

b: Time points: T1: Time 1; T2: Time 2; T3: Time 3; T4: Time 4; T5: Time 5.

Measures: ABAS-2:Adaptive Behaviour Assessment System-II; ADOS-G:Autism Diagnostic Observation Scale-Generic; CASS+CRS: Contextual Assessment of Social Skills + Conversation Rating Scale; CBCL: Child Behaviour Checklist; CHU9D: Child Health Utility 9D; CORS: Child Outcome Rating Scale; GSRS: Group Session Rating Scale; HCR: Homework Compliance Rate; KFC: KONTAKT™ Fidelity Checklist; Kopptiz DAPT: Koppitz Draw-A-Person Test; NEQ: Negative Effects Questionnaire; PPKS: Preparedness for Participating KONTAKT™ Scale; PRFQ: Parental Reflective Functioning Questionnaire; PSS: Perceived school support; TASC: Therapeutic Alliance Scales for Children; TFAQ: Theoretical Framework of Acceptability Questionnaire; TIC-PC: Treatment Inventory of Costs in Patients with Psychiatric Disorders - Child Version; SCS-DAP: Self-Concept Scale-Draw-A-Person; SES: Socioeconomic Status Scale; SFI: Screening

---

Face Interview; STARSS: Snack Time Assessment of Relationships and Social Skills; STI: Screening Telephone Interview; SRS-2: Social Responsiveness Scale-2; WISC-IV: Wechsler Intelligence Scale for Children-IV Chinese version.

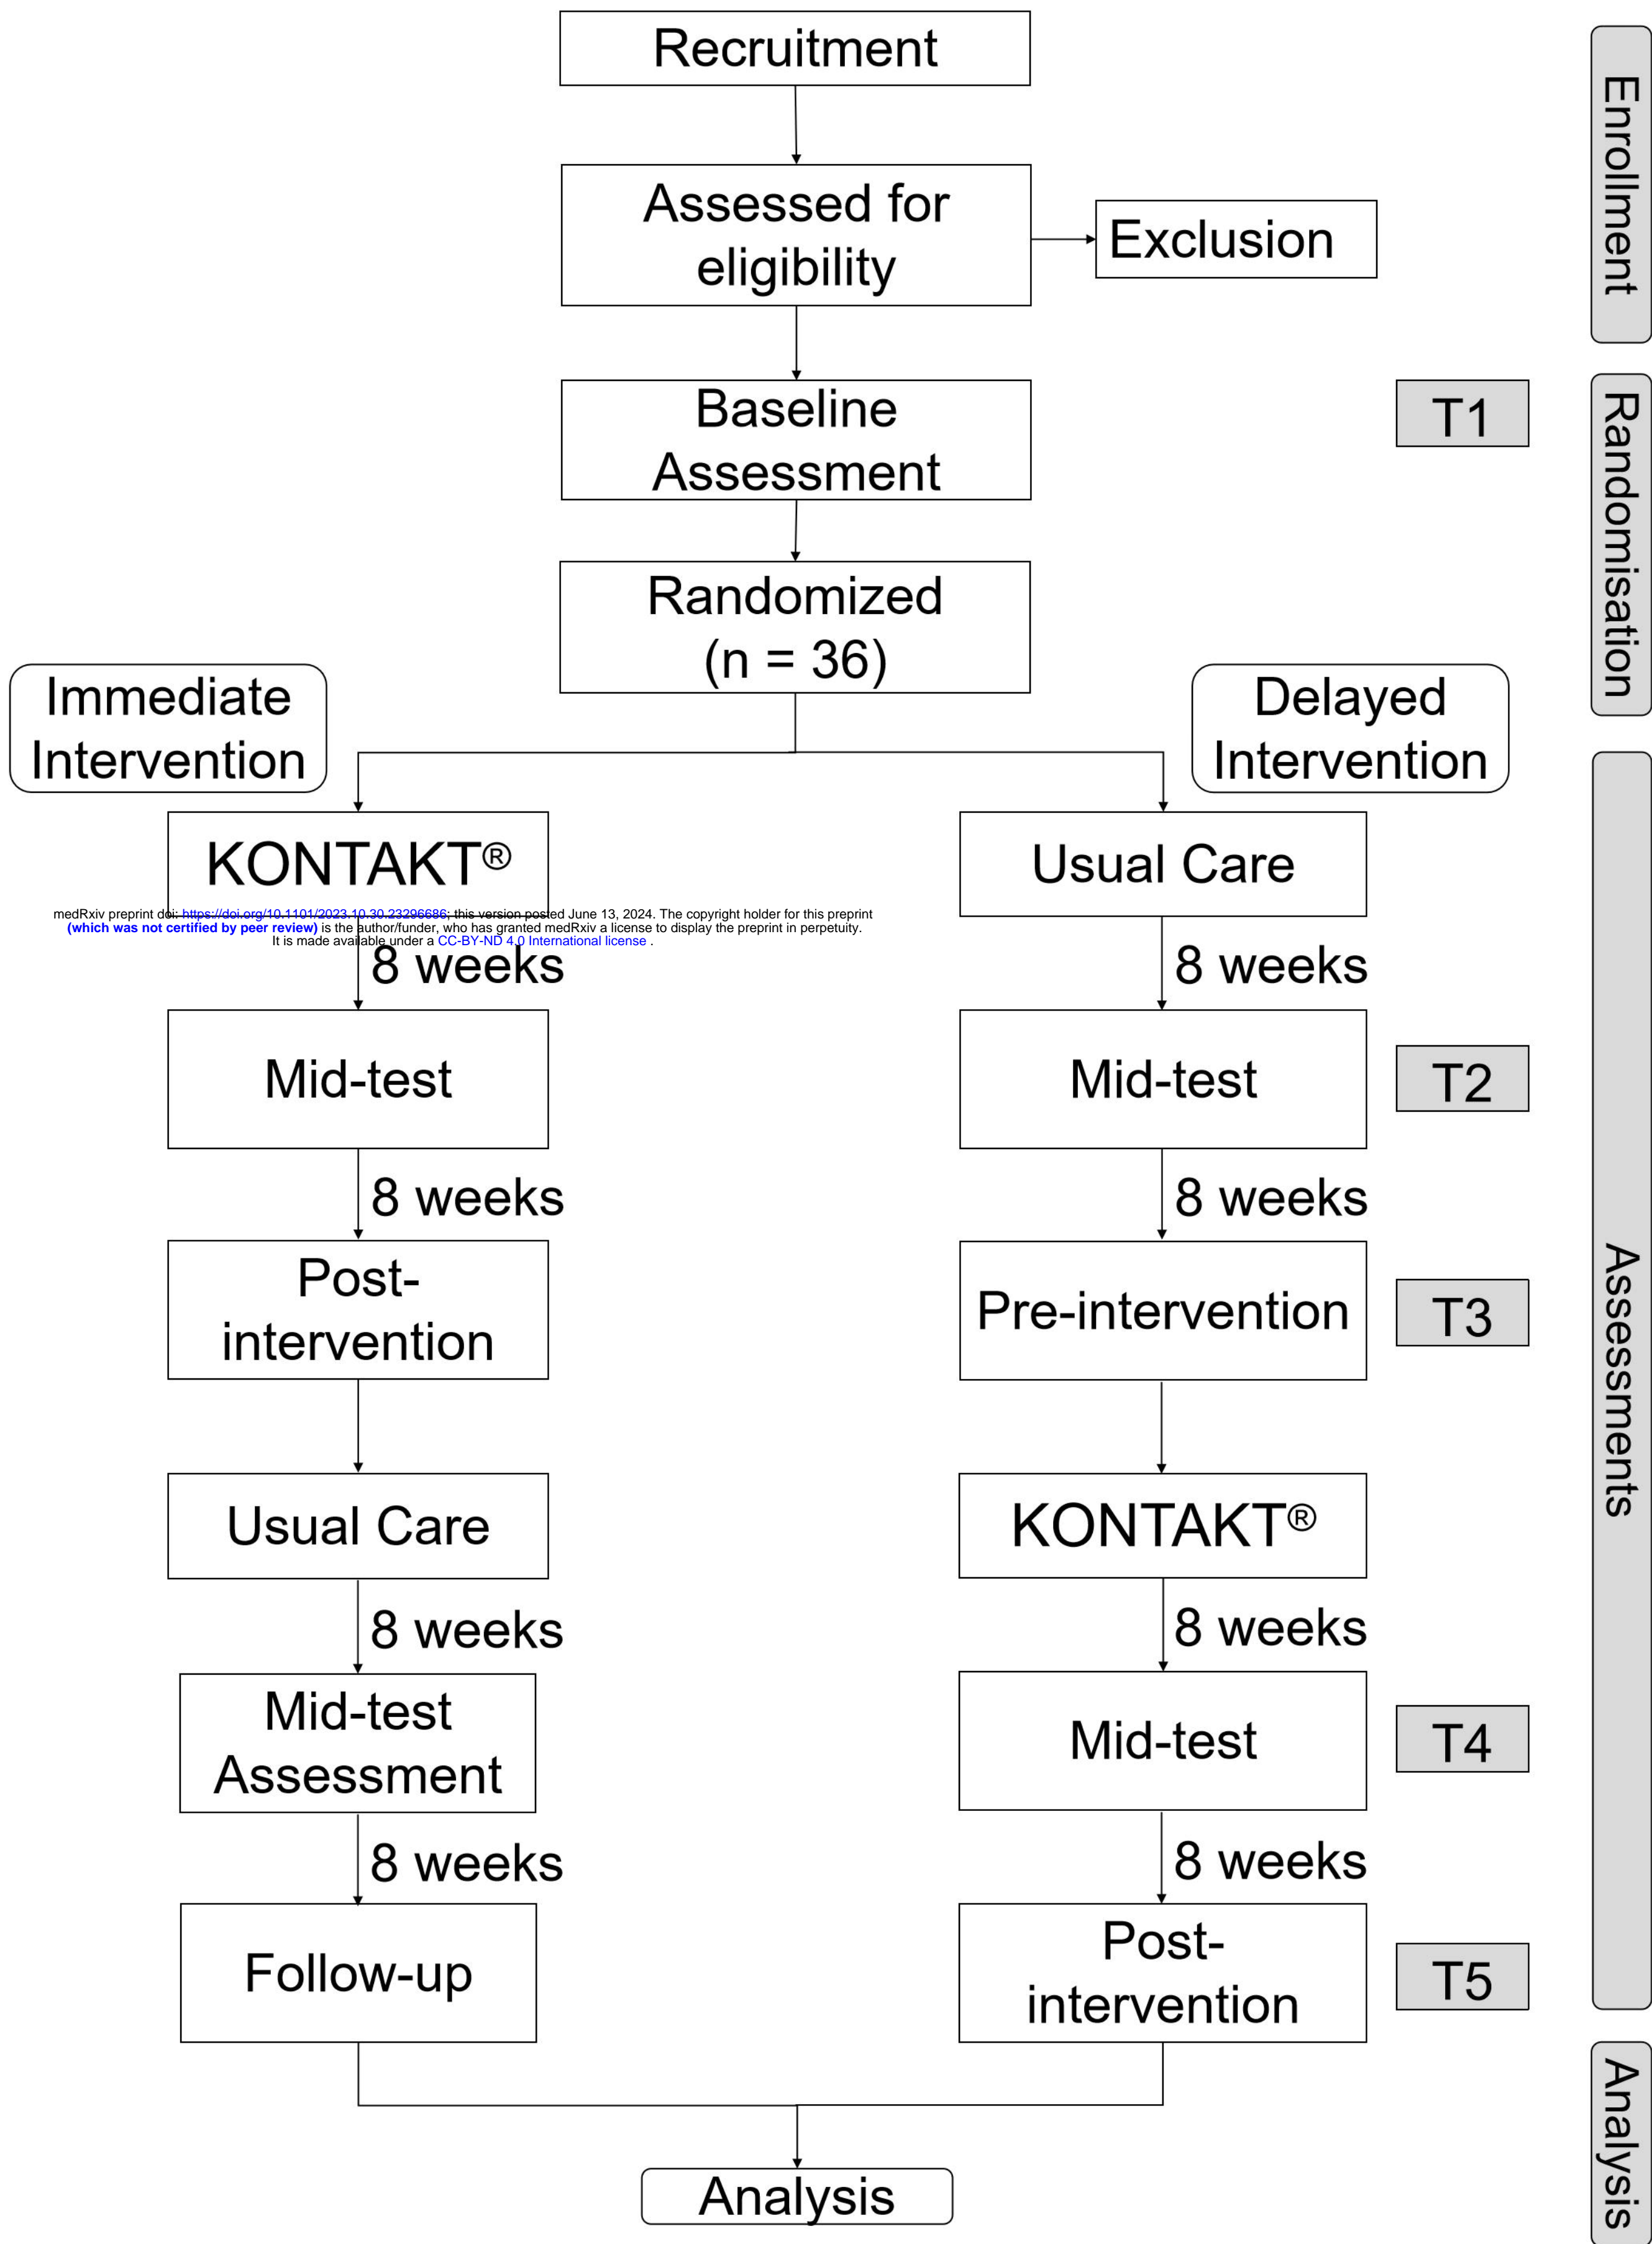

## Goals

Social communication and interaction skills  
 Social motivation  
 Social cognition  
 Social competence  
 Self-confidence  
 Awareness of self and others  
 Problem-solving strategies  
 Emotion recognition and expression

## Session Structure

Opening Round  
 Homework Review  
 Thematic Discussion  
 Group Activities  
 Snack Time  
 New Homework Assignment  
 Closing Round

## Overall Structure

16 weekly 60-minute sessions facilitated by 2-3 therapists with 4-6 children per group  
 3 sessions include parent meeting facilitated by one therapist  
 Session 1-11 fixed themes and similar homework  
 Session 12-15 individualised themes and homework  
 Session 16 summary and graduation

## Essential Elements

Principles of Cognitive Behaviour Therapy  
 Behavioural activation  
 Psychoeducation  
 Observational learning  
 Computerised social cognition training  
 Parental involvement

**KONTAKT™**

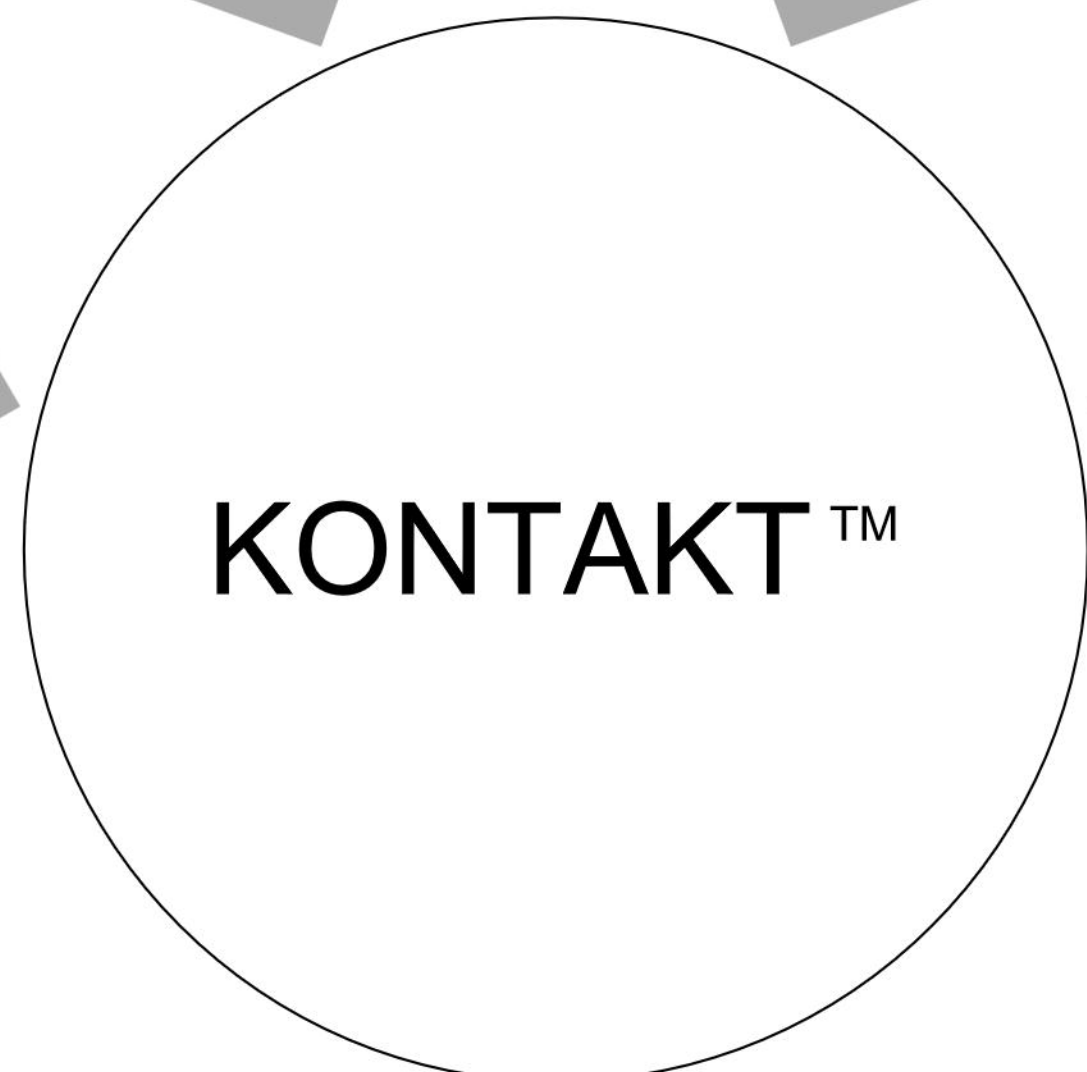

Source: https://medrxiv.org/content/medrxiv/early/2024/06/13/2023.10.30.23296686.full.pdf
